# Supplementary material for: Critical Network Structures and Medical Ecology Mechanisms Underlying Human Microbiome-Associated Diseases
Source: PubMed Central journal article supplement — iScience. 2020 May 23;23(6):101195. doi: 10.1016/j.isci.2020.101195 (PMC7303986; doi:10.1016/j.isci.2020.101195), 2020-05-23
Supplement: mmc1.pdf [file mmc1.pdf]

**iScience, Volume 23**

**Supplemental Information**

**Critical Network Structures and Medical Ecology**

**Mechanisms Underlying Human**

**Microbiome-Associated Diseases**

**Zhanshan (Sam) Ma**

# Supplemental Information

## Supplemental Tables S1-S15 and Figures S1-S3

**Table S1.** Brief information of the 27 case studies on microbiome associated diseases (MADs). Related to the Transparent Methods and Figs 2-7.

| Case No. | Sites           | Disease                          | Treatments (Groups)                                                       | References*<br>In “Transparent Methods” section                                                                             |
|----------|-----------------|----------------------------------|---------------------------------------------------------------------------|-----------------------------------------------------------------------------------------------------------------------------|
| 1        | Gut             | IBD (Inflammatory Bowel Disease) | Crohn’s disease (CD) (18), Ulcerative colitis (UC) (38), Healthy (18)     | Papa et al (2012)                                                                                                           |
| 2#@      |                 |                                  | CD (251), UC (324), Healthy (62)                                          | Halfvarson et al (2017)                                                                                                     |
| 3        |                 | Obesity                          | Lean (61), Obese (196) and Overweight (24)                                | Turnbaugh et al (2009)                                                                                                      |
| 4        |                 | CRC                              | Cancer (46) vs. Healthy (56)                                              | Wang et al (2012)                                                                                                           |
| 5#       |                 | HIV                              | Non-treatment (7) vs. ART treatment (11)                                  | Neff et al (2018)                                                                                                           |
| 6        |                 |                                  | WithART(14), WithoutART(12), Healthy (22)                                 | Lozupone et al (2013)                                                                                                       |
| 7        |                 |                                  | HIV Negative (20) vs. Positive (40)                                       | McHardy et al (2013)                                                                                                        |
| 8#       |                 | Type 1 diabetes and Obesity      | Normal T1D (33) vs Normal Healthy (33)                                    | Kim, Jane:<br><a href="https://clinicaltrials.gov/ct2/show/NCT02938806">https://clinicaltrials.gov/ct2/show/NCT02938806</a> |
|          |                 |                                  | Obesity T1D (24) vs. Obesity Healthy (26)                                 |                                                                                                                             |
| 9        |                 | Gout                             | Disease (41) vs. Healthy (42)                                             | Guo et al (2015)                                                                                                            |
| 10       |                 | MHE                              | MHE (25), Cirrhotic (25), Healthy (25)                                    | Zhang et al (2013)                                                                                                          |
| 11       |                 | Parkinson’s Disease              | Disease (205) vs. Healthy (133)                                           | Hill-Burns et al 2017)                                                                                                      |
| 12       |                 | Schizophrenia                    | Disease (25). vs. Healthy (25)                                            | Dilip Jeste (UC San Diego): <a href="https://profiles.ucsd.edu/dilip.jeste">https://profiles.ucsd.edu/dilip.jeste</a>       |
| 13       |                 | Autism, Neurotypical             | Autism (88), Neurotypical (41), Healthy (14)                              | Kang et al (2017)                                                                                                           |
| 14       | Atherosclerosis | Disease (15) vs. Healthy (15)    | Koren et al (2010)                                                        |                                                                                                                             |
| 15       | Oral            | Atherosclerosis                  | Disease (14) vs. Healthy (15)                                             | Koren et al (2010)                                                                                                          |
| 16       |                 | Periodontitis                    | PB (22), PnB (22), Healthy (17)                                           | Abusleme et al (2013)                                                                                                       |
| 17       |                 |                                  | Disease (29), Control (29), Healthy (29)                                  | Griffen et al (2012)                                                                                                        |
| 18       |                 | Smoking                          | Smoking (6) vs. Non-smoking (9)                                           | Lazarevic et al (2010)                                                                                                      |
| 19       |                 |                                  | Smoking (74) vs. Non-smoking (72)                                         | Charlson et al (2010)                                                                                                       |
| 20       | Nostril         | Smoking                          | Smoking (74) vs. Non-smoking (71)                                         | Charlson et al (2010)                                                                                                       |
| 21       | Skin            | Psoriasis                        | Disease (77), Control (83), Healthy (76)                                  | Alekseyenko et al (2013)                                                                                                    |
| 22       | Lung            | Cystic Fibrosis (CF)             | End of Treatment (23) vs. Exacerbation (23)                               | Fodor et al (2012)                                                                                                          |
| 23       |                 |                                  | Disease (16) vs. Healthy (10)                                             | Blainey et al 2012)                                                                                                         |
| 24       |                 | HIV                              | Disease (82) vs. Healthy (77)                                             | Lozupone et al (2013)                                                                                                       |
| 25       | Vaginal         | Bacterial Vaginosis (BV)         | ABV, SBV, Healthy                                                         | Srinivasan et al. (2012)                                                                                                    |
| 26       | Semen           | Infertile                        | Abnormal (33), Subnormal (28), Normal (35). Genus level and species level | Weng et al 2014                                                                                                             |
| 27@      | Milk            | Mastitis                         | Mastitis (4) vs. Healthy (16)                                             | Urbaniak (2015)                                                                                                             |

\*These are the same datasets used in Ma, Li & Gotelli (2019) Diversity-disease relationships and shared species analyses for human microbiome-associated diseases. The ISME Journal, <https://www.nature.com/articles/s41396-019-0395-y>, where a brief description on the datasets can be found.

#: Case No. 2, 5 & 8 datasets were not used for neutral-theoretic analysis because of computational failures.

@: Case No 2 & 27 datasets were not used for core/periphery/skeleton network analysis (computational failures).

## \*References (Cited in Table S1 for Data Sources)

- Papa E, Docktor M, Smillie C, et al. 2012. Non-Invasive Mapping of the Gastrointestinal Microbiota Identifies Children with Inflammatory Bowel Disease. *Plos One*, 7(6):e39242.
- Halfvarson J, Brislawn CJ, Lamendella R, et al. 2017. Dynamics of the human gut microbiome in Inflammatory Bowel Disease. *Nature Microbiology*, 2:17004.
- Turnbaugh PJ, Hamady M, Yatsunenko T, et al. 2009. A core gut microbiome in obese and lean twins. *Nature*, 457(7228):480.
- Wang T, Cai G, Qiu Y, et al. 2012. Structural segregation of gut microbiota between colorectal cancer patients and healthy volunteers. *The ISME Journal*, 6(2):320-329.
- Neff CP, Krueger O, Xiong K, et al. 2018. Fecal Microbiota Composition Drives Immune Activation in HIV-infected Individuals. *Ebiomedicine*, 30.
- Lozupone C, Cota-Gomez A, Palmer B E, et al. 2013. Widespread colonization of the lung by *Tropheryma whippelii* in HIV infection. *American Journal of Respiratory & Critical Care Medicine*, 187(10):1110-1117.
- Mchardy IH, Li X, Tong M, et al. 2013. HIV Infection is associated with compositional and functional shifts in the rectal mucosal microbiota. *Microbiome*, 1(1):26.
- Guo Z, Zhang J, Wang Z, et al. 2016. Intestinal Microbiota Distinguish Gout Patients from Healthy Humans. *Sci Rep*, 6:20602.
- Zhang Z, Zhai H, Geng J, et al. 2013. Large-scale survey of gut microbiota associated with MHE Via 16S rRNA-based pyrosequencing. *American Journal of Gastroenterology*, 108(10):1601-1611.
- Hill-Burns EM, Debelius JW, Morton JT et al. 2017. Parkinson's Disease and PD Medications Have Distinct Signatures of the Gut Microbiome. *Movement Disorders Official Journal of the Movement Disorder Society*, 32(5):739.
- Kim, Jane: for Study Case No 8 in Table S1 <https://clinicaltrials.gov/ct2/show/NCT02938806>
- Dilip Jeste (UC San Diego) for Study Case No 12 in Table S1: <https://profiles.ucsd.edu/dilip.jeste>
- Kang DW, Adams JB, Gregory AC, et al. 2017. Microbiota Transfer Therapy alters gut ecosystem and improves gastrointestinal and autism symptoms: an open-label study. *Microbiome*, 5(1):10.
- Koren O, Klaenhammer TR. 2011. Human oral, gut, and plaque microbiota in patients with atherosclerosis. *PNAS*, 108(Suppl 1):4592-4598.
- Koren O, Klaenhammer TR. 2011. Human oral, gut, and plaque microbiota in patients with atherosclerosis. *PNAS*, 108(Suppl 1):4592-4598.
- Abusleme L, Dupuy AK, Dutzan N, et al. 2013. The subgingival microbiome in health and periodontitis and its relationship with community biomass and inflammation. *The ISME Journal*, 7(5):1016-1025.
- Griffen AL, Beall CJ, Campbell JH, et al. 2012. Distinct and complex bacterial profiles in human periodontitis and health revealed by 16S pyrosequencing. *The ISME Journal*, 6(6):1176.

Lazarevic V, Whiteson K, Hernandez D, et al. 2010. Study of inter- and intra-individual variations in the salivary microbiota. *BMC Genomics*, 11(1):1-11.

Charlson ES, Chen J, Custersallen R, et al. 2010. Disordered microbial communities in the upper respiratory tract of cigarette smokers. *Plos One*, 5(12):e15216.

Charlson ES, Chen J, Custersallen R, et al. 2010. Disordered microbial communities in the upper respiratory tract of cigarette smokers. *Plos One*, 5(12):e15216.

Alekseyenko AV, Perezperez GI, Souza AD, et al. 2013. Community differentiation of the cutaneous microbiota in psoriasis. *Microbiome*, 1,1(2013-12-23), 1(1):31-31.

Fodor AA, Klem ER, Gilpin DF, et al. 2012. The Adult Cystic Fibrosis Airway Microbiota Is Stable over Time and Infection Type, and Highly Resilient to Antibiotic Treatment of Exacerbations. *Plos One*, 7(9):e45001.

Blainey PC, Milla CE, Cornfield DN, et al. 2012. Quantitative analysis of the human airway microbial ecology reveals a pervasive signature for cystic fibrosis. *Science Translational Medicine*, 4(153):153ra130.

Lozupone C, Cota-Gomez A, Palmer B E, et al. 2013. Widespread colonization of the lung by *Tropheryma whippelii* in HIV infection. *American Journal of Respiratory & Critical Care Medicine*, 187(10):1110-1117.

Srinivasan S, Hoffman NG, Morgan MT, et al. 2012. Bacterial Communities in Women with Bacterial Vaginosis: High Resolution Phylogenetic Analyses Reveal Relationships of Microbiota to Clinical Criteria. *Plos One*, 7(6):e37818.

Weng SL, Chiu CM, Lin FM, et al. 2014. Bacterial Communities in Semen from Men of Infertile Couples: Metagenomic Sequencing Reveals Relationships of Seminal Microbiota to Semen Quality. *Plos One*, 9(10):e110152.

Urbaniak C, Mcmillan A, Angelini M, et al. 2014. Effect of chemotherapy on the microbiota and metabolome of human milk, a case report. *Microbiome*, 2(1):24.

**Table S3.** The percentages (%) that passed neutrality test for Hubbell’s classic neutral theory with the 24 datasets of the human MADs (Related to Fig 4)

| Sites           | Diseases                         | Treatments   | Raw Community Data | Remove rarest species |        |        |        |        |
|-----------------|----------------------------------|--------------|--------------------|-----------------------|--------|--------|--------|--------|
|                 |                                  |              |                    | Singleton             | M1     | M2     | M3     |        |
| Gut             | IBD (Inflammatory Bowel Disease) | 1            | Healthy            | 22.22                 | 11.11  | 77.78  | 83.33  | 66.67  |
|                 |                                  |              | CD                 | 27.78                 | 5.56   | 83.33  | 77.78  | 72.22  |
|                 |                                  |              | UC                 | 65.79                 | 44.74  | 84.21  | 81.58  | 71.05  |
|                 | Obesity                          | 2            | Lean               | 0.00                  | 0.00   | 65.57  | 85.25  | 83.61  |
|                 |                                  |              | Overweight         | 4.17                  | 0.00   | 83.33  | 83.33  | 79.17  |
|                 |                                  |              | Obesity            | 2.06                  | 0.52   | 58.76  | 77.84  | 81.35  |
|                 | Cancer                           | 3            | Healthy            | 0.00                  | 0.00   | 30.36  | 80.36  | 75.00  |
|                 |                                  |              | Cancer             | 2.17                  | 0.00   | 45.65  | 84.78  | 80.43  |
|                 | HIV                              | 4            | Negative           | 0.00                  | 0.00   | 90.48  | 100.00 | 100.00 |
|                 |                                  |              | Treatment          | 21.43                 | 21.43  | 100.00 | 100.00 | 100.00 |
|                 |                                  |              | Non-treat          | 0.00                  | 0.00   | 83.33  | 100.00 | 100.00 |
|                 |                                  | 5            | Negative           | NA                    | 95.00  | 100.00 | 100.00 | 100.00 |
|                 | Positive                         |              | 100.00             | 100.00                | 100.00 | 100.00 | 100.00 |        |
|                 | Gout                             | 6            | Healthy            | 38.10                 | 26.19  | 97.62  | 100.00 | 97.62  |
|                 |                                  |              | Gout               | 60.98                 | 58.54  | 100.00 | 100.00 | 97.56  |
|                 | MHE                              | 7            | Healthy            | 12.50                 | 4.17   | 62.50  | 65.22  | 65.22  |
|                 |                                  |              | Control            | 16.00                 | 8.00   | 68.00  | 80.00  | 84.00  |
|                 |                                  |              | MHE                | 4.17                  | 8.33   | 70.83  | 83.33  | 79.17  |
|                 | Parkinson’s Disease              | 8            | Healthy            | 89.47                 | 33.08  | 97.74  | 96.24  | 93.98  |
|                 |                                  |              | PD                 | 88.29                 | 26.47  | 98.53  | 95.07  | 95.57  |
|                 | Schizophrenia                    | 9            | Healthy            | 12.00                 | 8.00   | 92.00  | 100.00 | 100.00 |
| Disease         |                                  |              | 12.00              | 20.00                 | 100.00 | 100.00 | 100.00 |        |
| Autism          | 10                               | Healthy      | 92.86              | 50.00                 | 85.71  | 85.71  | 78.57  |        |
|                 |                                  | Autism       | 95.45              | 53.41                 | 94.32  | 95.45  | 92.05  |        |
|                 |                                  | Neurotypical | 97.56              | 73.17                 | 100.00 | 95.12  | 95.12  |        |
| Atherosclerosis | 11                               | Healthy      | 0.00               | 0.00                  | 0.00   | 46.67  | 53.33  |        |
|                 |                                  | Disease      | 0.00               | 0.00                  | 6.67   | 53.33  | 60.00  |        |
| Oral            | Atherosclerosis                  | 12           | Healthy            | 73.33                 | 26.67  | 86.67  | 93.33  | 93.33  |
|                 |                                  |              | Disease            | 42.86                 | 14.29  | 100.00 | 100.00 | 100.00 |
|                 | Periodontitis                    | 13           | Healthy            | 82.35                 | 52.94  | 94.12  | 82.35  | 82.35  |
|                 |                                  |              | PB                 | 63.64                 | 18.18  | 77.27  | 63.64  | 68.18  |
|                 |                                  |              | PnB                | 40.91                 | 18.18  | 77.27  | 77.27  | 59.09  |
|                 |                                  | 14           | Healthy            | 3.45                  | 0.00   | 17.24  | 13.79  | 20.69  |
|                 |                                  |              | Control            | 10.34                 | 0.00   | 20.69  | 10.34  | 13.79  |
|                 |                                  |              | Disease            | 3.45                  | 0.00   | 6.90   | 0.00   | 6.90   |
|                 | Smoking                          | 15           | Non-Smoker         | 0.00                  | 0.00   | 55.56  | 88.89  | 77.78  |
|                 |                                  |              | Smoker             | 0.00                  | 0.00   | 100.00 | 100.00 | 100.00 |
|                 |                                  | 16           | Non-Smoker         | 26.76                 | 38.03  | 92.96  | 97.18  | 94.37  |
|                 |                                  |              | Smoker             | 6.85                  | 15.07  | 87.67  | 91.78  | 86.30  |
|                 |                                  | 17           | Non-Smoker         | 22.22                 | 0.00   | 83.33  | 76.39  | 72.22  |
|                 |                                  |              | Smoker             | 19.18                 | 4.17   | 69.44  | 68.06  | 63.89  |
|                 | Skin                             | Psoriasis    | 18                 | Control               | 7.23   | 2.41   | 32.53  | 73.49  |
| Normal          |                                  |              |                    | 3.95                  | 1.32   | 32.89  | 63.16  | 73.68  |

|                         |                              |    |              |        |        |        |        |        |
|-------------------------|------------------------------|----|--------------|--------|--------|--------|--------|--------|
|                         |                              |    | Lesion       | 6.49   | 1.30   | 40.26  | 71.43  | 81.82  |
| Lung                    | Cystic Fibrosis              | 19 | Treated      | 100.00 | 95.45  | 100.00 | 95.45  | 95.24  |
|                         |                              |    | Exacerbation | 100.00 | 96.00  | 100.00 | 95.65  | 100.00 |
|                         |                              | 20 | Healthy      | 44.44  | 11.11  | 66.67  | 66.67  | 55.56  |
|                         |                              |    | Disease      | 56.25  | 31.25  | 68.75  | 68.75  | 37.50  |
|                         | HIV                          | 21 | Negative     | 68.42  | 44.26  | 78.69  | 75.00  | 68.33  |
|                         |                              |    | Positive     | 75.56  | 53.33  | 88.89  | 88.89  | 84.44  |
| Vaginal                 | BV                           | 22 | Healthy      | 99.03  | 95.60  | 95.60  | 92.21  | 93.07  |
|                         |                              |    | BV           | 76.92  | 47.41  | 67.24  | 56.52  | 49.57  |
| Semen                   | Infertile<br>(Species level) | 23 | Normal       | 8.57   | 2.86   | 31.43  | 62.86  | 74.29  |
|                         |                              |    | Subnormal    | 0.00   | 0.00   | 35.71  | 75.00  | 89.29  |
|                         |                              |    | Abnormal     | 0.00   | 0.00   | 30.30  | 66.67  | 72.73  |
| Milk                    | Mastitis                     | 24 | Healthy      | 93.75  | 100.00 | 100.00 | 100.00 | 100.00 |
|                         |                              |    | Mastitis     | 100.00 | 100.00 | 100.00 | 75.00  | 75.00  |
| Passing Percentages (%) |                              |    | Health       | 35.65  | 26.16  | 68.75  | 78.29  | 77.71  |
|                         |                              |    | Diseased     | 39.13  | 27.05  | 75.29  | 80.88  | 79.28  |

**Table S4.** The  $p$ -value of Fisher's exact test for the numbers of samples passing the neutrality test between the healthy and diseased datasets (Related to Figs 2-3)

| Microbiome      | Disease                          | Index       | Healthy          | Diseased        | Raw Community Data | Remove rarest species |       |       |       |
|-----------------|----------------------------------|-------------|------------------|-----------------|--------------------|-----------------------|-------|-------|-------|
|                 |                                  |             |                  |                 |                    | Singleton             | M1    | M2    | M3    |
| Gut             | IBD (Inflammatory Bowel Disease) | 1           | Healthy          | CD              | 1.000              | 1.000                 | 1.000 | 1.000 | 1.000 |
|                 |                                  |             | Healthy          | UC              | 0.075              | 0.078                 | 1.000 | 1.000 | 1.000 |
|                 | Obesity                          | 2           | Lean             | Overweight      | 0.291              | 1.000                 | 0.583 | 1.000 | 1.000 |
|                 |                                  |             | Lean             | Obesity         | 0.576              | 1.000                 | 0.638 | 0.744 | 0.913 |
|                 | Cancer                           | 3           | Healthy          | Cancer          | 0.456              | 1.000                 | 0.343 | 0.883 | 0.881 |
|                 | HIV                              | 4           | Negative         | Treatment       | 0.081              | 0.081                 | 1.000 | 1.000 | 1.000 |
|                 |                                  |             | Negative         | Non-treatment   | 1.000              | 1.000                 | 1.000 | 1.000 | 1.000 |
|                 |                                  | 5           | Negative         | Positive        | NA                 | 1.000                 | 1.000 | 1.000 | 1.000 |
|                 | Gout                             | 6           | Healthy          | Gout            | 0.255              | 0.069                 | 1.000 | 1.000 | 1.000 |
|                 | MHE                              | 7           | Healthy          | Control         | 1.000              | 1.000                 | 1.000 | 0.663 | 0.660 |
|                 |                                  |             | Healthy          | MHE             | 0.611              | 1.000                 | 0.823 | 0.657 | 0.822 |
|                 | Parkinson's Disease              | 8           | Healthy          | PD              | 0.936              | 0.352                 | 1.000 | 1.000 | 0.936 |
|                 | Schizophrenia                    | 9           | Healthy          | Schizophrenia   | 1.000              | 0.427                 | 0.843 | 1.000 | 1.000 |
| Autism          | 10                               | Healthy     | Autism           | 1.000           | 1.000              | 0.837                 | 0.836 | 0.831 |       |
|                 |                                  | Healthy     | Neurotypical     | 1.000           | 0.614              | 0.823                 | 1.000 | 0.819 |       |
| Atherosclerosis | 11                               | Healthy     | Atherosclerosis  | 1.000           | 1.000              | 1.000                 | 1.000 | 1.000 |       |
| Oral            | Atherosclerosis                  | 12          | Healthy          | Atherosclerosis | 0.540              | 0.666                 | 1.000 | 1.000 | 1.000 |
|                 | Periodontitis                    | 13          | Healthy          | PB              | 0.628              | 0.199                 | 0.813 | 0.628 | 0.807 |
|                 |                                  |             | Healthy          | PnB             | 0.293              | 0.199                 | 0.813 | 1.000 | 0.618 |
|                 |                                  | 14          | Healthy          | Control         | 0.613              | 1.000                 | 1.000 | 1.000 | 0.735 |
|                 |                                  |             | Healthy          | Disease         | 1.000              | 1.000                 | 0.430 | 0.116 | 0.265 |
|                 | Smoking                          | 15          | Non-smoking      | Smoking         | 1.000              | 1.000                 | 0.692 | 1.000 | 1.000 |
| 16              |                                  | Non-smoking | Smoking          | 0.008           | 0.018              | 0.904                 | 0.905 | 0.718 |       |
| 17              |                                  | Non-smoking | Smoking          | 0.841           | 0.245              | 0.527                 | 0.700 | 0.695 |       |
| Skin            | Psoriasis                        | 18          | Control          | Lesion          | 1.000              | 1.000                 | 0.541 | 1.000 | 0.907 |
|                 |                                  |             | Normal           | Lesion          | 0.720              | 1.000                 | 0.536 | 0.702 | 0.714 |
| Lung            | Cystic Fibrosis (CF)             | 19          | End of Treatment | Exacerbation    | 1.000              | 1.000                 | 1.000 | 1.000 | 1.000 |
|                 |                                  | 20          | Healthy          | CF              | 1.000              | 0.634                 | 1.000 | 1.000 | 0.716 |
|                 | HIV                              | 21          | Negative         | Positive        | 0.836              | 0.610                 | 0.771 | 0.660 | 0.550 |
| Vaginal         | BV                               | 22          | Healthy          | BV              | 0.236              | 0.002                 | 0.096 | 0.033 | 0.004 |
| Semen           | Infertile (Species level)        | 23          | Normal           | Subnormal       | 0.256              | 1.000                 | 0.806 | 0.695 | 0.707 |
|                 |                                  |             | Normal           | Abnormal        | 0.243              | 1.000                 | 1.000 | 1.000 | 1.000 |
| Milk            | Mastitis                         | 24          | Healthy          | Mastitis        | 1.000              | 1.000                 | 1.000 | 1.000 | 1.000 |

**Table S5.** The  $p$ -values of the permutation tests for the differences in the neutral theory parameters between the healthy and diseased datasets (Related to Figs 2-3)

| Micro-biome                     | Disease                          | Index       | Healthy          | Diseased        | Raw Community Data |       | Remove rarest species |       |          |       |          |       |          |       |
|---------------------------------|----------------------------------|-------------|------------------|-----------------|--------------------|-------|-----------------------|-------|----------|-------|----------|-------|----------|-------|
|                                 |                                  |             |                  |                 |                    |       | Singleton             |       | M1       |       | M2       |       | M3       |       |
|                                 |                                  |             |                  |                 | $\theta$           | $m$   | $\theta$              | $m$   | $\theta$ | $m$   | $\theta$ | $m$   | $\theta$ | $m$   |
|                                 | IBD (Inflammatory Bowel Disease) | 1           | Healthy          | CD              | 0.542              | 0.839 | 0.563                 | 0.239 | 0.628    | 0.888 | 0.815    | 0.501 | 0.791    | 0.406 |
|                                 |                                  |             | Healthy          | UC              | 0.001              | 0.308 | 0.000                 | 0.938 | 0.000    | 0.993 | 0.001    | 0.572 | 0.002    | 0.658 |
|                                 | Obesity                          | 2           | Lean             | Overweight      | 0.722              | 0.926 | 0.707                 | 0.322 | 0.657    | 0.030 | 0.693    | 0.671 | 0.650    | 0.957 |
|                                 |                                  |             | Lean             | Obesity         | 0.081              | 0.123 | 0.246                 | 0.408 | 0.313    | 0.048 | 0.225    | 0.080 | 0.179    | 0.493 |
|                                 | Cancer                           | 3           | Healthy          | Cancer          | 0.000              | 0.062 | 0.043                 | 0.359 | 0.042    | 0.827 | 0.076    | 0.699 | 0.321    | 0.508 |
|                                 | HIV                              | 4           | Negative         | Treatment       | 0.052              | 1.000 | 0.096                 | 0.325 | 0.127    | 0.414 | 0.175    | 0.702 | 0.263    | 0.606 |
|                                 |                                  |             | Negative         | Non-treatment   | 0.811              | 0.782 | 0.471                 | 0.427 | 0.385    | 0.699 | 0.326    | 0.242 | 0.274    | 0.044 |
|                                 |                                  | 5           | Negative         | Positive        | NA                 | NA    | 0.694                 | 0.650 | 0.460    | 0.994 | 0.408    | 0.866 | 0.735    | 0.506 |
|                                 | Gout                             | 6           | Healthy          | Gout            | 0.001              | 0.641 | 0.001                 | 0.680 | 0.001    | 0.401 | 0.002    | 0.106 | 0.003    | 0.381 |
|                                 | MHE                              | 7           | Healthy          | Control         | 0.073              | 0.670 | 0.278                 | 0.154 | 0.132    | 0.356 | 0.226    | 0.653 | 0.335    | 0.057 |
|                                 |                                  |             | Healthy          | MHE             | 0.301              | 0.153 | 0.255                 | 0.273 | 0.147    | 0.959 | 0.025    | 0.124 | 0.028    | 0.001 |
| Parkinson's Disease             | 8                                | Healthy     | PD               | 0.084           | 0.149              | 0.118 | 0.736                 | 0.077 | 0.234    | 0.118 | 0.471    | 0.135 | 0.718    |       |
| Schizophrenia                   | 9                                | Healthy     | Schizophrenia    | 0.307           | 0.848              | 0.464 | 0.832                 | 0.453 | 0.095    | 0.397 | 0.715    | 0.407 | 0.788    |       |
| Autism                          | 10                               | Healthy     | Autism           | 0.314           | 0.487              | 0.283 | 0.163                 | 0.300 | 0.305    | 0.343 | 0.842    | 0.481 | 0.789    |       |
|                                 |                                  | Healthy     | Neurotypical     | 0.626           | 0.667              | 0.695 | 0.886                 | 0.738 | 0.626    | 0.826 | 0.547    | 0.782 | 0.977    |       |
| Atherosclerosis                 | 11                               | Healthy     | Atherosclerosis  | 0.595           | 0.267              | 0.775 | 0.137                 | 0.775 | 0.217    | 0.838 | 0.217    | 0.870 | 0.461    |       |
| Oral                            | Atherosclerosis                  | 12          | Healthy          | Atherosclerosis | 0.033              | 0.780 | 0.026                 | 0.290 | 0.023    | 0.780 | 0.041    | 0.158 | 0.026    | 0.093 |
|                                 | Periodontitis                    | 13          | Healthy          | PB              | 0.000              | 0.604 | 0.000                 | 0.006 | 0.000    | 0.027 | 0.000    | 0.333 | 0.000    | 0.039 |
|                                 |                                  |             | Healthy          | PnB             | 0.002              | 0.077 | 0.000                 | 0.012 | 0.000    | 0.408 | 0.000    | 0.110 | 0.001    | 0.029 |
|                                 |                                  | 14          | Healthy          | Control         | 0.013              | 0.362 | 0.012                 | 0.210 | 0.014    | 0.265 | 0.013    | 0.307 | 0.008    | 0.330 |
|                                 |                                  |             | Healthy          | Disease         | 0.000              | 0.163 | 0.000                 | 0.163 | 0.000    | 0.215 | 0.000    | 0.345 | 0.000    | 0.353 |
|                                 | Smoking                          | 15          | Non-smoking      | Smoking         | 0.607              | 0.456 | 0.328                 | 0.088 | 0.388    | 0.005 | 0.689    | 0.776 | 0.864    | 0.272 |
|                                 |                                  | 16          | Non-smoking      | Smoking         | 0.001              | 0.007 | 0.055                 | 0.092 | 0.073    | 0.842 | 0.153    | 0.297 | 0.057    | 0.012 |
| 17                              |                                  | Non-smoking | Smoking          | 0.138           | 0.100              | 0.091 | 0.511                 | 0.069 | 0.337    | 0.442 | 0.790    | 0.534 | 0.285    |       |
| Skin                            | Psoriasis                        | 18          | Control          | Lesion          | 0.889              | 0.017 | 0.774                 | 0.040 | 0.962    | 0.038 | 0.951    | 0.004 | 0.967    | 0.348 |
|                                 |                                  | Normal      | Lesion           | 0.548           | 0.937              | 0.616 | 0.676                 | 0.789 | 0.949    | 0.578 | 0.811    | 0.432 | 0.932    |       |
| Lung                            | Cystic Fibrosis (CF)             | 19          | End of Treatment | Exacerbation    | 0.074              | 0.195 | 0.492                 | 1.000 | 0.453    | 0.992 | 0.227    | 0.411 | 0.363    | 0.442 |
|                                 |                                  | 20          | Healthy          | CF              | 0.000              | 0.388 | 0.000                 | 0.207 | 0.000    | 0.251 | 0.049    | 0.032 | 0.049    | 0.037 |
|                                 | HIV                              | 21          | Negative         | Positive        | 0.286              | 0.422 | 0.697                 | 0.486 | 0.645    | 0.730 | 0.828    | 0.571 | 0.843    | 0.571 |
| Vaginal                         | BV                               | 22          | Healthy          | BV              | 0.000              | 0.000 | 0.000                 | 0.000 | 0.000    | 0.000 | 0.000    | 0.000 | 0.000    |       |
| Semen                           | Infertile (Species level)        | 23          | Normal           | Subnormal       | 0.550              | 0.437 | 0.429                 | 0.645 | 0.470    | 0.645 | 0.462    | 0.174 | 0.268    | 0.726 |
|                                 |                                  |             | Normal           | Abnormal        | 0.705              | 0.922 | 0.592                 | 0.542 | 0.617    | 0.212 | 0.464    | 0.271 | 0.335    | 0.145 |
| Milk                            | Mastitis                         | 24          | Healthy          | Mastitis        | 0.494              | 0.554 | 1.000                 | 0.800 | 0.800    | 0.533 | 1.000    | 0.800 | 0.374    | 0.304 |
| Significant difference rate (%) |                                  |             |                  |                 | 33.33              | 9.09  | 30.30                 | 12.12 | 30.30    | 18.18 | 30.30    | 9.09  | 30.30    | 21.21 |



**Table S7.** The shared core/periphery analysis between the healthy and diseased treatments based on the 1000 sets of permuted core/periphery networks (CPN) built with FDR control and  $p=0.001$  (Related to Figs 6-7)

| Microbiome                                              | Disease                          | Index    | Healthy          | Diseased        | Core           |         |                 | Periphery      |        |                 |
|---------------------------------------------------------|----------------------------------|----------|------------------|-----------------|----------------|---------|-----------------|----------------|--------|-----------------|
|                                                         |                                  |          |                  |                 | Obs.           | Perm.   | <i>p</i> -value | Obs.           | Perm.  | <i>p</i> -value |
| Gut                                                     | IBD (Inflammatory Bowel Disease) | 1        | Healthy          | CD              | 1              | 1.618   | 0.545           | 7              | 9.674  | 0.282           |
|                                                         |                                  |          | Healthy          | UC              | 1              | 0.900   | 0.776           | 9              | 6.196  | 0.898           |
|                                                         | Obesity                          | 3        | Lean             | Overweight      | 1              | 1.895   | 0.505           | 12             | 7.495  | 0.932           |
|                                                         |                                  |          | Lean             | Obesity         | 10             | 9.781   | 0.597           | 23             | 20.753 | 0.720           |
|                                                         | Cancer                           | 4        | Healthy          | Cancer          | 9              | 11.796  | 0.249           | 11             | 15.48  | 0.160           |
|                                                         | HIV                              | 5        | Negative         | Treatment       | 22             | 28.498  | 0.178           | 43             | 37.691 | 0.792           |
|                                                         |                                  |          | Negative         | Non-treatment   | 24             | 25.658  | 0.456           | 27             | 30.546 | 0.357           |
|                                                         |                                  | 6        | Negative         | Treatment       | 15             | 26.606  | 0.029           | 25             | 33.909 | 0.107           |
|                                                         |                                  |          | Negative         | Non-treatment   | 11             | 26.427  | 0.002           | 23             | 32.571 | 0.106           |
|                                                         | 7                                | Negative | Positive         | 22              | 13.173         | 0.957   | 18              | 18.304         | 0.541  |                 |
|                                                         | T1D (Lean)                       | 8        | Healthy          | T1D             | 10             | 8.496   | 0.763           | 19             | 16.18  | 0.792           |
|                                                         | T1D (Obesity)                    |          | Healthy          | T1D             | 20             | 15.005  | 0.902           | 28             | 24.807 | 0.760           |
|                                                         | Gout                             | 9        | Healthy          | Gout            | 1              | 5.43    | 0.035           | 17             | 17.809 | 0.492           |
|                                                         | MHE                              | 10       | Healthy          | MHE             | 6              | 4.86    | 0.772           | 6              | 13.842 | 0.026           |
|                                                         |                                  |          | Control          | MHE             | 3              | 4.702   | 0.342           | 12             | 13.68  | 0.427           |
|                                                         | Parkinson's Disease              | 11       | Healthy          | PD              | 38             | 45.7    | 0.170           | 40             | 47.696 | 0.177           |
| Schizophrenia                                           | 12                               | Healthy  | Schizophrenia    | 30              | 29.815         | 0.547   | 26              | 34.969         | 0.077  |                 |
| Autism                                                  | 13                               | Healthy  | Autism           | 3               | 1.97           | 0.865   | 9               | 6.978          | 0.768  |                 |
|                                                         |                                  | Healthy  | Neurotypical     | 0               | 0.706          | 0.679   | 4               | 4.875          | 0.580  |                 |
| Atherosclerosis                                         | 14                               | Healthy  | Atherosclerosis  | 29              | 27.573         | 0.671   | 23              | 30.778         | 0.102  |                 |
| Oral                                                    | Atherosclerosis                  | 15       | Healthy          | Atherosclerosis | 0              | 0.523   | 0.589           | 2              | 4.616  | 0.170           |
|                                                         | Periodontitis                    | 16       | Healthy          | PB              | 1              | 0.592   | 0.865           | 2              | 4.145  | 0.257           |
|                                                         |                                  |          | Healthy          | PnB             | 0              | 0.619   | 0.605           | 2              | 3.978  | 0.266           |
|                                                         |                                  | 17       | Healthy          | Disease         | 15             | 6.815   | 0.928           | 14             | 6.387  | 0.939           |
|                                                         | Control                          |          | Disease          | 0               | 6.799          | 0.092   | 0               | 6.244          | 0.085  |                 |
|                                                         | Smoking                          | 18       | Non-smoking      | Smoking         | 4              | 2.368   | 0.887           | 13             | 14.387 | 0.438           |
| Non-smoking                                             |                                  |          | Smoking          | 20              | 34.991         | 0.019   | 20              | 34.701         | 0.008  |                 |
| Non-smoking                                             |                                  |          | Smoking          | 0               | 0.957          | 0.522   | 16              | 11.421         | 0.905  |                 |
| Skin                                                    | Psoriasis                        | 21       | Control          | Lesion          | 84             | 112.266 | 0.014           | 94             | 116.43 | 0.032           |
|                                                         |                                  |          | Normal           | Lesion          | 109            | 105.23  | 0.644           | 106            | 110.03 | 0.393           |
| Lung                                                    | Cystic Fibrosis (CF)             | 22       | End of Treatment | Exacerbation    | 0              | 8.69    | 0.011           | 0              | 27.068 | 0.000           |
|                                                         |                                  |          | Healthy          | CF              | 0              | 0.549   | 0.644           | 1              | 2.016  | 0.447           |
|                                                         | HIV                              | 24       | Negative         | Positive        | 181            | 168.219 | 0.605           | 118            | 105.99 | 0.741           |
| Vaginal                                                 | BV                               | 25       | Healthy          | BV              | 0              | 13.183  | 0.003           | 0              | 23.395 | 0.000           |
| Semen                                                   | Infertile (Genus level)          | 26       | Normal           | Subnormal       | 1              | 59.733  | 0.000           | 0              | 57.235 | 0.000           |
|                                                         |                                  |          | Normal           | Abnormal        | 0              | 63.879  | 0.000           | 4              | 58.901 | 0.000           |
|                                                         | Normal                           |          | Subnormal        | 69              | 64.506         | 0.658   | 63              | 67.569         | 0.378  |                 |
|                                                         | Normal                           |          | Abnormal         | 67              | 65.134         | 0.584   | 51              | 69.039         | 0.066  |                 |
| Percentage of Comparisons with Reduced Shared Skeletons |                                  |          |                  |                 | 23.68% (9/38)  |         |                 | 18.42% (7/38)  |        |                 |
| Percentage of Comparisons without the change            |                                  |          |                  |                 | 76.32% (29/38) |         |                 | 81.58% (31/38) |        |                 |

\*Obs.=The Observed value. Perm.=The mean value from 1000 permuted networks. *p*-value is from permutation test.

**Table S8.** The  $p$ -values from the permutation test for the differences in the core/periphery network (CPN) properties between the H (healthy) & D (diseased) treatments with 1000 sets of permuted CPNs ( $p$ -value<0.05, indicating significant difference) (Related to Figs 6-7)

| Microbiome                                       | Disease                          | Index       | Healthy          | Diseased        | $\rho$ | C/<br>(C+P) | B11   | B12 (21) | B22   | Nestedness<br>(S) |
|--------------------------------------------------|----------------------------------|-------------|------------------|-----------------|--------|-------------|-------|----------|-------|-------------------|
| Gut                                              | IBD (Inflammatory Bowel Disease) | 1           | Healthy          | CD              | 0.00   | 0.00        | 0.00  | 1.00     | 0.00  | 1.00              |
|                                                  |                                  |             | Healthy          | UC              | 0.00   | 1.00        | 1.00  | 0.00     | 0.00  | 0.00              |
|                                                  | Obesity                          | 3           | Lean             | Overweight      | 0.00   | 0.00        | 0.00  | 1.00     | 1.00  | 0.00              |
|                                                  |                                  |             | Lean             | Obesity         | 0.00   | 0.00        | 0.00  | 1.00     | 0.00  | 0.00              |
|                                                  | Cancer                           | 4           | Healthy          | Cancer          | 0.00   | 0.00        | 0.00  | 0.00     | 0.00  | 0.00              |
|                                                  | HIV                              | 5           | Negative         | Treatment       | 0.00   | 0.00        | 0.00  | 0.00     | 1.00  | 0.00              |
|                                                  |                                  |             | Negative         | Non-treatment   | 1.00   | 1.00        | 1.00  | 0.00     | 0.00  | 0.00              |
|                                                  |                                  | 6           | Negative         | Treatment       | 0.00   | 1.00        | 0.00  | 0.00     | 0.00  | 0.00              |
|                                                  |                                  |             | Negative         | Non-treatment   | 1.00   | 0.00        | 1.00  | 1.00     | 0.00  | 1.00              |
|                                                  | 7                                | Negative    | Positive         | 0.00            | 1.00   | 0.00        | 0.00  | 1.00     | 0.00  |                   |
|                                                  | T1D (Lean)                       | 8           | Healthy          | T1D             | 0.00   | 0.00        | 0.00  | 0.00     | 0.00  | 0.00              |
|                                                  | T1D (Obesity)                    |             | Healthy          | T1D             | 1.00   | 1.00        | 0.00  | 0.00     | 0.00  | 0.00              |
|                                                  | Gout                             | 9           | Healthy          | Gout            | 1.00   | 1.00        | 1.00  | 0.00     | 0.00  | 1.00              |
|                                                  | MHE                              | 10          | Healthy          | MHE             | 1.00   | 1.00        | 1.00  | 0.00     | 0.00  | 1.00              |
|                                                  |                                  |             | Control          | MHE             | 1.00   | 1.00        | 1.00  | 0.00     | 1.00  | 1.00              |
| Parkinson's Disease                              | 11                               | Healthy     | PD               | 0.00            | 0.00   | 0.00        | 0.00  | 0.00     | 0.00  |                   |
| Schizophrenia                                    | 12                               | Healthy     | Schizophrenia    | 0.00            | 0.00   | 1.00        | 1.00  | 1.00     | 1.00  |                   |
| Autism                                           | 13                               | Healthy     | Autism           | 1.00            | 1.00   | 1.00        | 1.00  | 0.00     | 1.00  |                   |
|                                                  |                                  | Healthy     | Neurotypical     | 1.00            | 1.00   | 1.00        | 1.00  | 0.00     | 1.00  |                   |
| Atherosclerosis                                  | 14                               | Healthy     | Atherosclerosis  | 1.00            | 1.00   | 1.00        | 1.00  | 0.00     | 1.00  |                   |
| Oral                                             | Atherosclerosis                  | 15          | Healthy          | Atherosclerosis | 0.00   | 0.00        | 0.00  | 1.00     | 0.00  | 0.00              |
|                                                  | Periodontitis                    | 16          | Healthy          | PB              | 1.00   | 1.00        | 0.00  | 1.00     | 1.00  | 1.00              |
|                                                  |                                  |             | Healthy          | PnB             | 0.00   | 0.00        | 0.00  | 1.00     | 1.00  | 0.00              |
|                                                  |                                  | 17          | Healthy          | Disease         | 0.00   | 1.00        | 0.00  | 0.00     | 0.00  | 0.00              |
|                                                  |                                  |             | Control          | Disease         | 0.00   | 1.00        | 1.00  | 1.00     | 0.00  | 1.00              |
|                                                  | Smoking                          | 18          | Non-smoking      | Smoking         | 1.00   | 1.00        | 1.00  | 1.00     | 1.00  | 1.00              |
| 19                                               |                                  | Non-smoking | Smoking          | 0.00            | 1.00   | 0.00        | 0.00  | 0.00     | 0.00  |                   |
| 20                                               |                                  | Non-smoking | Smoking          | 1.00            | 0.00   | 1.00        | 0.00  | 1.00     | 1.00  |                   |
| Skin                                             | Psoriasis                        | 21          | Control          | Lesion          | 0.00   | 1.00        | 1.00  | 1.00     | 1.00  | 0.00              |
|                                                  |                                  |             | Normal           | Lesion          | 0.00   | 1.00        | 1.00  | 0.00     | 0.00  | 0.00              |
| Lung                                             | Cystic Fibrosis (CF)             | 22          | End of Treatment | Exacerbation    | 0.00   | 0.00        | 1.00  | 1.00     | 0.00  | 0.00              |
|                                                  |                                  | 23          | Healthy          | CF              | 1.00   | 1.00        | 1.00  | 1.00     | 0.00  | 0.00              |
|                                                  | HIV                              | 24          | Negative         | Positive        | 0.00   | 1.00        | 0.00  | 0.00     | 0.00  | 0.00              |
| Vaginal                                          | BV                               | 25          | Healthy          | BV              | 0.00   | 0.00        | 0.00  | 1.00     | 0.00  | 0.00              |
| Semen                                            | Infertile (Genus level)          | 26          | Normal           | Subnormal       | 0.00   | 1.00        | 0.00  | 1.00     | 0.00  | 0.00              |
|                                                  |                                  |             | Normal           | Abnormal        | 0.00   | 0.00        | 1.00  | 1.00     | 0.00  | 0.00              |
|                                                  | Normal                           |             | Subnormal        | 0.00            | 1.00   | 0.00        | 0.00  | 0.00     | 0.00  |                   |
|                                                  | Normal                           |             | Abnormal         | 1.00            | 1.00   | 1.00        | 1.00  | 1.00     | 1.00  |                   |
| <b>Percentage of Significant Differences (%)</b> |                                  |             |                  |                 | 59.18  | 44.90       | 51.02 | 46.94    | 63.27 | 57.14             |

Here the algorithm for permutation test is as follows:

OP=|Observed Property Difference between H & D|

PP=1000 values of |H-D| from permuted networks

N=number of permutations satisfying  $PP \leq OP$

$Pseudo-P-value = N/1000$

**Table S9.** The shared skeleton analysis between the healthy and diseased treatments based on the 1000 sets of permuted high-salience skeleton networks (HSNs) built with FDR control and  $p=0.001$  ( $HSS>0$ ) (Related to Figs 6-7)

| Microbiome                                              | Disease                          | Index    | Healthy          | Diseased        | HSS (High Salience Skeleton) Value>0 |           |                 |
|---------------------------------------------------------|----------------------------------|----------|------------------|-----------------|--------------------------------------|-----------|-----------------|
|                                                         |                                  |          |                  |                 | Obs.                                 | Perm.     | <i>p</i> -value |
| Gut                                                     | IBD (Inflammatory Bowel Disease) | 1        | Healthy          | CD              | 49                                   | 143.27    | 0.111           |
|                                                         |                                  |          | Healthy          | UC              | 80                                   | 55.44     | 0.785           |
|                                                         | Obesity                          | 3        | Lean             | Overweight      | 166                                  | 111.85    | 0.803           |
|                                                         |                                  |          | Lean             | Obesity         | 1132                                 | 1072.96   | 0.605           |
|                                                         | Cancer                           | 4        | Healthy          | Cancer          | 630                                  | 1185.00   | 0.026           |
|                                                         | HIV                              | 5        | Negative         | Treatment       | NA                                   | NA        | NA              |
|                                                         |                                  |          | Negative         | Non-treatment   | NA                                   | NA        | NA              |
|                                                         |                                  | 6        | Negative         | Treatment       | 2718                                 | 6057.995  | 0.007           |
|                                                         |                                  |          | Negative         | Non-treatment   | 1934                                 | 5855.577  | 0.003           |
|                                                         | 7                                | Negative | Positive         | 2049            | 1495.90                              | 0.839     |                 |
|                                                         | T1D (Lean)                       | 8        | Healthy          | T1D             | 1059                                 | 923.64    | 0.720           |
|                                                         | T1D (Obesity)                    |          | Healthy          | T1D             | 3393                                 | 2411.57   | 0.965           |
|                                                         | Gout                             | 9        | Healthy          | Gout            | 407                                  | 748.53    | 0.046           |
|                                                         | MHE                              | 10       | Healthy          | MHE             | 172                                  | 489.41    | 0.041           |
|                                                         |                                  |          | Control          | MHE             | 309                                  | 478.13    | 0.206           |
| Parkinson's Disease                                     | 11                               | Healthy  | PD               | 3630            | 6724.11                              | 0.015     |                 |
| Schizophrenia                                           | 12                               | Healthy  | Schizophrenia    | 4861            | 6664.09                              | 0.067     |                 |
| Autism                                                  | 13                               | Healthy  | Autism           | 43              | 89.80                                | 0.425     |                 |
|                                                         |                                  | Healthy  | Neurotypical     | 24              | 46.23                                | 0.662     |                 |
| Atherosclerosis                                         | 14                               | Healthy  | Atherosclerosis  | 4288            | 5592.62                              | 0.083     |                 |
| Oral                                                    | Atherosclerosis                  | 15       | Healthy          | Atherosclerosis | 2                                    | 26.69     | 0.031           |
|                                                         | Periodontitis                    | 16       | Healthy          | PB              | 1                                    | 23.57     | 0.057           |
|                                                         |                                  |          | Healthy          | PnB             | 1                                    | 23.11     | 0.047           |
|                                                         |                                  | 17       | Healthy          | Disease         | 1353                                 | 441.901   | 0.944           |
|                                                         | Control                          |          | Disease          | 0               | 437.733                              | 0.043     |                 |
|                                                         | Smoking                          | 18       | Non-smoking      | Smoking         | 279                                  | 353.64    | 0.388           |
| 19                                                      |                                  |          | Non-smoking      | Smoking         | 1707                                 | 4029.50   | 0.029           |
| 20                                                      |                                  |          | Non-smoking      | Smoking         | 153                                  | 147.17    | 0.577           |
| Skin                                                    | Psoriasis                        | 21       | Control          | Lesion          | 37098                                | 62519.264 | 0.002           |
|                                                         |                                  |          | Normal           | Lesion          | 64145                                | 55303.513 | 0.833           |
| Lung                                                    | Cystic Fibrosis (CF)             | 22       | End of Treatment | Exacerbation    | 0                                    | 456.75    | 0.000           |
|                                                         |                                  | 23       | Healthy          | CF              | 0                                    | 6.78      | 0.202           |
|                                                         | HIV                              | 24       | Negative         | Positive        | 19746                                | 33750.779 | 0.346           |
| Vaginal                                                 | BV                               | 25       | Healthy          | BV              | 0                                    | 23.359    | 0.000           |
| Semen                                                   | Infertile (Genus level)          | 26       | Normal           | Subnormal       | 3                                    | 654.33    | 0.000           |
|                                                         |                                  |          | Normal           | Abnormal        | 6                                    | 561.187   | 0.000           |
|                                                         | Normal                           |          | Subnormal        | 26291           | 29221.901                            | 0.402     |                 |
|                                                         | Normal                           |          | Abnormal         | 24225           | 29292.624                            | 0.249     |                 |
| Percentage of Comparisons with Reduced Shared Skeletons |                                  |          |                  |                 | 39.47%(15/38)                        |           |                 |
| Percentage of Comparisons without the change            |                                  |          |                  |                 | 60.53%(23/38)                        |           |                 |

\*In general, the observed shared skeletons (*OSS*) should be smaller or, at most, equal with the permuted shared skeletons (*PSS*), *i.e.*,  $OSS \leq PSS$ . In other words, the case of  $O > P$  is unlikely and corresponding *p*-value would be  $p=1$ .

**Table S10.** The  $p$ -values from the permutation test for the differences in the high salience skeleton network (HSN) properties between the H & D treatments with 1000 sets of permuted HSNs ( $p$  value<0.05, indicating significant difference) (Related to Figs 6-7)

| Microbiome                            | Disease                          | Index    | Healthy          | Diseased        | Links (%) | Max   | Skewness | Kurtosis | $r_{HSS}$ |
|---------------------------------------|----------------------------------|----------|------------------|-----------------|-----------|-------|----------|----------|-----------|
| Gut                                   | IBD (Inflammatory Bowel Disease) | 1        | Healthy          | CD              | 1.00      | 0.00  | 1.00     | 0.00     | 0.00      |
|                                       |                                  |          | Healthy          | UC              | 1.00      | 0.00  | 1.00     | 1.00     | 0.00      |
|                                       | Obesity                          | 3        | Lean             | Overweight      | 1.00      | 1.00  | 1.00     | 0.00     | 0.00      |
|                                       |                                  |          | Lean             | Obesity         | 0.00      | 0.00  | 0.00     | 0.00     | 0.00      |
|                                       | Cancer                           | 4        | Healthy          | Cancer          | 0.00      | 0.00  | 1.00     | 1.00     | 0.00      |
|                                       | HIV                              | 5        | Negative         | Treatment       | 0.00      | 0.00  | 1.00     | 1.00     | 0.00      |
|                                       |                                  |          | Negative         | Non-treatment   | 0.00      | 0.00  | 1.00     | 0.00     | 0.00      |
|                                       |                                  | 6        | Negative         | Treatment       | 0.00      | 0.00  | 0.00     | 0.00     | 0.00      |
|                                       |                                  |          | Negative         | Non-treatment   | 0.00      | 1.00  | 0.00     | 1.00     | 0.00      |
|                                       | 7                                | Negative | Positive         | 1.00            | 1.00      | 1.00  | 0.00     | 0.00     |           |
|                                       | T1D (Lean)                       | 8        | Healthy          | T1D             | 1.00      | 1.00  | 1.00     | 0.00     | 1.00      |
|                                       | T1D (Obesity)                    |          | Healthy          | T1D             | 0.00      | 0.00  | 1.00     | 1.00     | 1.00      |
|                                       | Gout                             | 9        | Healthy          | Gout            | 0.00      | 0.00  | 1.00     | 1.00     | 1.00      |
|                                       | MHE                              | 10       | Healthy          | MHE             | 1.00      | 0.00  | 1.00     | 1.00     | 0.00      |
|                                       |                                  |          | Control          | MHE             | 0.00      | 1.00  | 0.00     | 0.00     | 0.00      |
| Parkinson's Disease                   | 11                               | Healthy  | PD               | 0.00            | 0.00      | 1.00  | 1.00     | 0.00     |           |
| Schizophrenia                         | 12                               | Healthy  | Schizophrenia    | 0.00            | 0.00      | 0.00  | 0.00     | 0.00     |           |
| Autism                                | 13                               | Healthy  | Autism           | 0.00            | 0.00      | 0.00  | 0.00     | 0.00     |           |
|                                       |                                  | Healthy  | Neuro-typical    | 1.00            | 1.00      | 0.00  | 0.00     | 1.00     |           |
| Atherosclerosis                       | 14                               | Healthy  | Atherosclerosis  | 0.00            | 0.00      | 0.00  | 0.00     | 0.00     |           |
| Oral                                  | Atherosclerosis                  | 15       | Healthy          | Atherosclerosis | 1.00      | 0.00  | 1.00     | 1.00     | 0.00      |
|                                       | Periodontitis                    | 16       | Healthy          | PB              | 0.00      | 0.00  | 0.00     | 0.00     | 0.00      |
|                                       |                                  |          | Healthy          | PnB             | 0.00      | 0.00  | 1.00     | 1.00     | 0.00      |
|                                       |                                  |          | Healthy          | Disease         | 1.00      | 1.00  | 0.00     | 0.00     | 0.00      |
|                                       | Smoking                          | 17       | Control          | Disease         | 1.00      | 1.00  | 0.00     | 0.00     | 0.00      |
|                                       |                                  |          | Non-smoking      | Smoking         | 1.00      | 1.00  | 1.00     | 0.00     | 1.00      |
| Non-smoking                           |                                  |          | Smoking          | 0.00            | 0.00      | 0.00  | 0.00     | 1.00     |           |
| 20                                    | Non-smoking                      | Smoking  | 1.00             | 1.00            | 1.00      | 1.00  | 1.00     |          |           |
|                                       | Non-smoking                      | Smoking  | 1.00             | 1.00            | 1.00      | 1.00  | 1.00     |          |           |
| Skin                                  | Psoriasis                        | 21       | Control          | Lesion          | 0.00      | 1.00  | 1.00     | 1.00     | 0.00      |
|                                       |                                  |          | Normal           | Lesion          | 1.00      | 1.00  | 0.00     | 0.00     | 1.00      |
| Lung                                  | Cystic Fibrosis (CF)             | 22       | End of Treatment | Exacerbation    | 1.00      | 0.00  | 1.00     | 1.00     | 0.00      |
|                                       |                                  |          | Healthy          | CF              | 0.00      | 0.00  | 0.00     | 0.00     | 1.00      |
|                                       | HIV                              | 24       | Negative         | Positive        | 0.00      | 0.00  | 0.00     | 0.00     | 0.00      |
| Vaginal                               | BV                               | 25       | Healthy          | BV              | 0.00      | 0.00  | 0.00     | 0.00     | 0.00      |
| Semen                                 | Infertile (Genus level)          | 26       | Normal           | Subnormal       | 1.00      | 0.00  | 0.00     | 0.00     | 0.00      |
|                                       |                                  |          | Normal           | Abnormal        | 1.00      | 0.00  | 0.00     | 0.00     | 0.00      |
|                                       | Normal                           |          | Subnormal        | 1.00            | 1.00      | 1.00  | 1.00     | 1.00     |           |
|                                       | Normal                           |          | Abnormal         | 1.00            | 0.00      | 1.00  | 0.00     | 0.00     |           |
| Infertile Species level)              |                                  |          |                  |                 |           |       |          |          |           |
| <b>% With significant differences</b> |                                  |          |                  |                 | 52.63     | 65.79 | 47.37    | 63.16    | 73.68     |

**Table S11.** The *observed* core/periphery parameters in the core-periphery networks for the 25 MAD (microbiome associated disease) datasets with FDR control and  $p$ -value=0.001 (Related to Figs 6-7)

| Sites               | Diseases                         | Treatments   | $r$             | C/(C+P) | Density Matrix |          |       | Nestedness (S) |       |
|---------------------|----------------------------------|--------------|-----------------|---------|----------------|----------|-------|----------------|-------|
|                     |                                  |              |                 |         | B11            | B12 (21) | B22   |                |       |
| Gut                 | IBD (Inflammatory Bowel Disease) | 1            | Healthy         | 0.179   | 0.310          | 0.098    | 0.001 | 0.022          | 0.020 |
|                     |                                  |              | CD              | 0.254   | 0.174          | 0.210    | 0.000 | 0.016          | 0.018 |
|                     |                                  |              | UC              | 0.246   | 0.344          | 0.119    | 0.003 | 0.014          | 0.021 |
|                     | Obesity                          | 3            | Lean            | 0.405   | 0.250          | 0.277    | 0.004 | 0.013          | 0.026 |
|                     |                                  |              | Overweight      | 0.236   | 0.283          | 0.129    | 0.007 | 0.012          | 0.019 |
|                     |                                  |              | Obesity         | 0.042   | 0.478          | 0.012    | 0.004 | 0.005          | 0.009 |
|                     | Cancer                           | 4            | Healthy         | 0.027   | 0.470          | 0.006    | 0.002 | 0.003          | 0.003 |
|                     |                                  |              | Cancer          | 0.079   | 0.406          | 0.021    | 0.003 | 0.004          | 0.006 |
|                     | HIV                              | 5            | Negative        | 0.074   | 0.459          | 0.019    | 0.003 | 0.005          | 0.007 |
|                     |                                  |              | Treatment       | 0.104   | 0.498          | 0.031    | 0.006 | 0.004          | 0.012 |
|                     |                                  |              | Non-treatment   | 0.086   | 0.465          | 0.028    | 0.007 | 0.006          | 0.011 |
|                     |                                  | 6            | Negative        | 0.117   | 0.446          | 0.039    | 0.007 | 0.006          | 0.013 |
|                     |                                  |              | Treatment       | 0.082   | 0.442          | 0.026    | 0.005 | 0.007          | 0.010 |
|                     |                                  |              | Non-treatment   | 0.091   | 0.413          | 0.034    | 0.007 | 0.008          | 0.012 |
|                     | 7                                | Negative     | 0.180           | 0.444   | 0.066          | 0.006    | 0.007 | 0.018          |       |
|                     |                                  | Positive     | 0.064           | 0.434   | 0.017          | 0.003    | 0.006 | 0.007          |       |
|                     | T1D (Lean)                       | 8            | Normal-Healthy  | 0.098   | 0.426          | 0.029    | 0.003 | 0.007          | 0.009 |
|                     |                                  |              | Normal-T1D      | 0.068   | 0.480          | 0.018    | 0.003 | 0.007          | 0.007 |
|                     | T1D (Obesity)                    | 8            | Obesity-Healthy | 0.068   | 0.465          | 0.016    | 0.002 | 0.006          | 0.006 |
|                     |                                  |              | Obesity-T1D     | 0.068   | 0.469          | 0.020    | 0.004 | 0.008          | 0.009 |
|                     | Gout                             | 9            | Healthy         | 0.178   | 0.411          | 0.071    | 0.006 | 0.010          | 0.018 |
| Gout                |                                  |              | 0.118           | 0.436   | 0.041          | 0.004    | 0.011 | 0.013          |       |
| MHE                 | 10                               | Healthy      | 0.174           | 0.310   | 0.081          | 0.005    | 0.011 | 0.015          |       |
|                     |                                  | Control      | 0.182           | 0.345   | 0.087          | 0.006    | 0.014 | 0.019          |       |
|                     |                                  | MHE          | 0.225           | 0.287   | 0.120          | 0.003    | 0.014 | 0.018          |       |
| Parkinson's Disease | 11                               | Healthy      | 0.083           | 0.429   | 0.023          | 0.004    | 0.005 | 0.013          |       |
|                     |                                  | PD           | 0.037           | 0.507   | 0.008          | 0.003    | 0.003 | 0.007          |       |
| Schizophrenia       | 12                               | Healthy      | 0.058           | 0.490   | 0.017          | 0.005    | 0.005 | 0.008          |       |
|                     |                                  | Disease      | 0.059           | 0.460   | 0.018          | 0.005    | 0.006 | 0.008          |       |
| Autism              | 13                               | Healthy      | 0.301           | 0.331   | 0.218          | 0.013    | 0.030 | 0.043          |       |
|                     |                                  | Autism       | 0.176           | 0.345   | 0.075          | 0.005    | 0.010 | 0.023          |       |
|                     |                                  | Neurotypical | 0.187           | 0.374   | 0.086          | 0.004    | 0.017 | 0.021          |       |
| Atherosclerosis     | 14                               | Healthy      | 0.054           | 0.483   | 0.015          | 0.004    | 0.006 | 0.007          |       |
|                     |                                  | Disease      | 0.039           | 0.500   | 0.012          | 0.004    | 0.006 | 0.006          |       |
| Oral                | Atherosclerosis                  | 15           | Healthy         | 0.430   | 0.218          | 0.470    | 0.000 | 0.043          | 0.047 |
|                     |                                  |              | Disease         | 0.164   | 0.340          | 0.076    | 0.000 | 0.019          | 0.017 |
|                     | Periodontitis                    | 16           | Healthy         | 0.336   | 0.255          | 0.286    | 0.000 | 0.035          | 0.037 |
|                     |                                  |              | PB              | 0.186   | 0.289          | 0.128    | 0.000 | 0.032          | 0.027 |
|                     |                                  | 17           | PnB             | 0.612   | 0.136          | 1.000    | 0.000 | 0.034          | 0.042 |
|                     |                                  |              | Healthy         | 0.113   | 0.496          | 0.153    | 0.068 | 0.093          | 0.095 |
|                     | Smoking                          | 18           | Control         | 0.027   | 0.518          | 0.032    | 0.023 | 0.021          | 0.025 |
|                     |                                  |              | Disease         | 0.013   | 0.513          | 0.021    | 0.024 | 0.029          | 0.024 |
|                     | Smoking                          | 18           | Non-Smoker      | 0.187   | 0.378          | 0.114    | 0.016 | 0.023          | 0.032 |
|                     |                                  |              | Smoker          | 0.296   | 0.383          | 0.205    | 0.017 | 0.031          | 0.049 |
|                     |                                  | 19           | Non-Smoker      | 0.170   | 0.391          | 0.082    | 0.011 | 0.012          | 0.037 |
|                     |                                  |              | Smoker          | 0.094   | 0.437          | 0.032    | 0.006 | 0.008          | 0.019 |
|                     | 20                               | Non-Smoker   | 0.382           | 0.206   | 0.324          | 0.001    | 0.020 | 0.031          |       |
|                     |                                  | Smoker       | 0.491           | 0.188   | 0.431          | 0.006    | 0.013 | 0.030          |       |
| Skin                | Psoriasis                        | 21           | Control         | 0.036   | 0.497          | 0.010    | 0.004 | 0.003          | 0.007 |
|                     |                                  |              | Normal          | 0.032   | 0.491          | 0.008    | 0.003 | 0.003          | 0.006 |

|                 |                              |                       |              |       |       |       |       |       |       |
|-----------------|------------------------------|-----------------------|--------------|-------|-------|-------|-------|-------|-------|
|                 |                              |                       | Lesion       | 0.028 | 0.501 | 0.008 | 0.004 | 0.003 | 0.007 |
| Lung            | Cystic Fibrosis              | 22                    | Treated      | 0.000 | 1.000 | 1.000 | 0.000 | 0.000 | 1.000 |
|                 |                              |                       | Exacerbation | 0.471 | 0.250 | 1.000 | 0.000 | 0.200 | 0.143 |
|                 |                              | 23                    | Healthy      | 0.681 | 0.207 | 1.000 | 0.000 | 0.063 | 0.076 |
|                 | Disease                      |                       | 0.608        | 0.167 | 1.000 | 0.000 | 0.053 | 0.061 |       |
|                 | HIV                          | 24                    | Negative     | 0.089 | 0.496 | 0.050 | 0.020 | 0.012 | 0.045 |
|                 |                              |                       | Positive     | 0.188 | 0.495 | 0.146 | 0.045 | 0.024 | 0.090 |
| Vaginal         | BV                           | 25                    | Healthy      | 0.387 | 0.353 | 0.400 | 0.000 | 0.109 | 0.092 |
|                 |                              |                       | BV           | 0.632 | 0.500 | 1.000 | 0.000 | 1.000 | 0.333 |
| Semen           | Infertile<br>(Genus level)   | 26                    | Normal       | 0.326 | 0.250 | 0.400 | 0.000 | 0.076 | 0.066 |
|                 |                              |                       | Subnormal    | 0.625 | 0.227 | 1.000 | 0.000 | 0.103 | 0.104 |
|                 |                              |                       | Abnormal     | 0.348 | 0.214 | 0.400 | 0.000 | 0.048 | 0.045 |
|                 | Infertile<br>(Species level) |                       | Normal       | 0.051 | 0.501 | 0.014 | 0.005 | 0.004 | 0.007 |
|                 |                              |                       | Subnormal    | 0.082 | 0.461 | 0.027 | 0.007 | 0.005 | 0.011 |
|                 |                              |                       | Abnormal     | 0.049 | 0.488 | 0.016 | 0.007 | 0.005 | 0.008 |
| <b>Healthy</b>  |                              | <b>Mean</b>           | 0.175        | 0.419 | 0.178 | 0.010 | 0.023 | 0.051 |       |
|                 |                              | <b>Standard Error</b> | 0.026        | 0.020 | 0.042 | 0.003 | 0.004 | 0.022 |       |
| <b>Diseased</b> |                              | <b>Mean</b>           | 0.216        | 0.374 | 0.238 | 0.006 | 0.052 | 0.037 |       |
|                 |                              | <b>Standard Error</b> | 0.033        | 0.020 | 0.060 | 0.001 | 0.028 | 0.010 |       |

**Table S12.** The *observed* statistical network properties of the high-salience skeleton networks for the 25 MAD (microbiome associated disease) datasets with FDR control and  $p$ -value=0.001 (Related to Figs 6-7)

| Sites               | Diseases                         | Treatments   |                 | Statistics of HSS |       |       |            |            |            | Assortativity |
|---------------------|----------------------------------|--------------|-----------------|-------------------|-------|-------|------------|------------|------------|---------------|
|                     |                                  |              |                 | Links (%)         | Max   | Mean  | Std. Error | Skewness   | Kurtosis   | $r_{HSS}$     |
| Gut                 | IBD (Inflammatory Bowel Disease) | 1            | Healthy         | 99.985            | 0.026 | 0.017 | 0.000      | -33.349    | 3334.500   | -0.009        |
|                     |                                  |              | CD              | 99.945            | 0.035 | 0.023 | 0.001      | -17.459    | 911.999    | -0.012        |
|                     |                                  |              | UC              | 99.984            | 0.019 | 0.013 | 0.000      | -31.949    | 3059.750   | -0.006        |
|                     | Obesity                          | 3            | Lean            | 99.948            | 0.026 | 0.013 | 0.000      | -7.085     | 973.275    | -0.007        |
|                     |                                  |              | Overweight      | 99.994            | 0.016 | 0.011 | 0.000      | -53.842    | 8695.000   | -0.005        |
|                     |                                  |              | Obesity         | 73.168            | 0.519 | 0.004 | 0.020      | 22.358     | 519.682    | -0.002        |
|                     | Cancer                           | 4            | Healthy         | 99.992            | 0.008 | 0.003 | 0.000      | 29.987     | 8911.597   | -0.002        |
|                     |                                  |              | Cancer          | 100.000           | 0.004 | 0.004 | 0.000      | 0.000      | 0.000      | -0.002        |
|                     | HIV                              | 5            | Negative        | 99.959            | 0.015 | 0.003 | 0.000      | 50.530     | 5104.754   | -0.002        |
|                     |                                  |              | Treatment       | 99.998            | 0.005 | 0.002 | 0.000      | -72.261    | 24815.977  | -0.001        |
|                     |                                  |              | Non-treat       | 99.950            | 0.017 | 0.002 | 0.000      | 54.377     | 5780.542   | -0.001        |
|                     |                                  | 6            | Negative        | 99.995            | 0.007 | 0.004 | 0.000      | -48.101    | 10994.593  | -0.002        |
|                     |                                  |              | Treatment       | 99.999            | 0.007 | 0.004 | 0.000      | -129.184   | 50063.500  | -0.002        |
|                     |                                  |              | Non-treat       | 99.999            | 0.007 | 0.004 | 0.000      | -129.184   | 50063.500  | -0.002        |
|                     |                                  | 7            | Negative        | 99.995            | 0.010 | 0.005 | 0.000      | -37.779    | 9847.053   | -0.003        |
|                     |                                  |              | Positive        | 99.973            | 0.015 | 0.006 | 0.000      | -3.581     | 2036.490   | -0.003        |
|                     | T1D (Lean)                       | 8            | Normal-Healthy  | 99.998            | 0.010 | 0.007 | 0.000      | -87.327    | 22876.000  | -0.003        |
|                     |                                  |              | Normal-T1D      | 99.996            | 0.010 | 0.007 | 0.000      | -62.362    | 11664.500  | -0.003        |
|                     | T1D (Obesity)                    |              | Obesity-Healthy | 100.000           | 0.006 | 0.006 | 0.000      | 0.000      | 0.000      | -0.003        |
|                     |                                  |              | Obesity-T1D     | 99.998            | 0.008 | 0.006 | 0.000      | -103.204   | 31951.000  | -0.003        |
| Gout                | 9                                | Healthy      | 99.949          | 0.030             | 0.008 | 0.000 | 27.417     | 3262.266   | -0.004     |               |
|                     |                                  | Gout         | 99.986          | 0.017             | 0.008 | 0.000 | -6.210     | 3660.833   | -0.004     |               |
| MHE                 | 10                               | Healthy      | 100.000         | 0.010             | 0.010 | 0.000 | 0.000      | 0.000      | -0.005     |               |
|                     |                                  | Control      | 99.996          | 0.014             | 0.009 | 0.000 | -63.368    | 12044.500  | -0.005     |               |
|                     |                                  | MHE          | 100.000         | 0.013             | 0.013 | 0.000 | 0.000      | 0.000      | -0.007     |               |
| Parkinson's Disease | 11                               | Healthy      | 88.116          | 0.332             | 0.005 | 0.012 | 22.326     | 540.969    | -0.003     |               |
|                     |                                  | PD           | 59.691          | 0.638             | 0.003 | 0.024 | 24.250     | 610.921    | -0.001     |               |
| Schizophrenia       | 12                               | Healthy      | 100.000         | 0.004             | 0.004 | 0.000 | 0.000      | 0.000      | -0.002     |               |
|                     |                                  | Disease      | 99.999          | 0.005             | 0.004 | 0.000 | -114.004   | 38988.500  | -0.002     |               |
| Autism              | 13                               | Healthy      | 99.992          | 0.019             | 0.013 | 0.000 | -45.183    | 6122.500   | -0.006     |               |
|                     |                                  | Autism       | 91.270          | 0.301             | 0.009 | 0.013 | 18.661     | 378.342    | -0.004     |               |
|                     |                                  | Neurotypical | 99.947          | 0.040             | 0.011 | 0.000 | 16.341     | 2387.524   | -0.006     |               |
| Atherosclerosis     | 14                               | Healthy      | 99.999          | 0.006             | 0.004 | 0.000 | -141.020   | 59657.500  | -0.002     |               |
|                     |                                  | Disease      | 99.999          | 0.005             | 0.004 | 0.000 | -163.247   | 79947.000  | -0.002     |               |
| Oral                | Atherosclerosis                  | 15           | Healthy         | 100.000           | 0.036 | 0.036 | 0.000      | 0.000      | 0.000      | -0.019        |
|                     |                                  |              | Disease         | 100.000           | 0.019 | 0.019 | 0.000      | 0.000      | 0.000      | -0.010        |
|                     | Periodontitis                    | 16           | Healthy         | 100.000           | 0.036 | 0.036 | 0.000      | 0.000      | 0.000      | -0.019        |
|                     |                                  |              | PB              | 99.899            | 0.067 | 0.044 | 0.002      | -12.865    | 494.500    | -0.023        |
|                     |                                  |              | PnB             | 99.894            | 0.068 | 0.045 | 0.002      | -12.576    | 472.500    | -0.023        |
|                     |                                  | 17           | Healthy         | 99.999            | 0.008 | 0.005 | 0.000      | -115.039   | 39700.000  | -0.003        |
|                     |                                  |              | Control         | 100.000           | 0.002 | 0.002 | 0.000      | -350.019   | 367538.500 | -0.001        |
|                     |                                  | Disease      | 100.000         | 0.002             | 0.001 | 0.000 | -409.198   | 502326.000 | -0.001     |               |
|                     | Smoking                          | 18           | Non-Smoker      | 99.995            | 0.014 | 0.010 | 0.000      | -60.193    | 10867.500  | -0.005        |
|                     |                                  |              | Smoker          | 99.993            | 0.017 | 0.011 | 0.000      | -50.379    | 7612.000   | -0.006        |
|                     |                                  | 19           | Non-Smoker      | 70.997            | 0.520 | 0.008 | 0.029      | 14.357     | 223.799    | -0.004        |
|                     |                                  |              | Smoker          | 91.622            | 0.202 | 0.006 | 0.008      | 18.791     | 387.874    | -0.003        |
|                     |                                  | 20           | Non-Smoker      | 99.029            | 0.108 | 0.020 | 0.003      | 7.964      | 211.591    | -0.010        |
| Smoker              |                                  |              | 98.322          | 0.121             | 0.013 | 0.004 | 15.895     | 348.415    | -0.007     |               |

|                 |                              |    |                  |         |       |       |        |          |           |        |
|-----------------|------------------------------|----|------------------|---------|-------|-------|--------|----------|-----------|--------|
| Skin            | Psoriasis                    | 21 | Control          | 96.188  | 0.133 | 0.002 | 0.003  | 38.406   | 1640.442  | -0.001 |
|                 |                              |    | Normal           | 94.728  | 0.170 | 0.002 | 0.003  | 39.778   | 1789.015  | -0.001 |
|                 |                              |    | Lesion           | 94.563  | 0.149 | 0.002 | 0.003  | 34.358   | 1341.691  | -0.001 |
| Lung            | Cystic Fibrosis              | 22 | Treated          | 100.000 | 1.000 | 1.000 | NA     | NA       | NA        | -1.000 |
|                 |                              |    | Exacerbation     | 100.000 | 0.250 | 0.250 | 0.000  | 0.000    | 0.000     | -0.143 |
|                 |                              | 23 | Healthy          | 100.000 | 0.069 | 0.069 | 0.000  | 0.000    | 0.000     | -0.036 |
|                 | Disease                      |    | 99.770           | 0.100   | 0.067 | 0.004 | -8.544 | 217.000  | -0.034    |        |
|                 | HIV                          | 24 | Negative         | 13.101  | 0.946 | 0.001 | 0.020  | 29.803   | 1053.016  | -0.001 |
| Positive        |                              |    | 92.261           | 0.365   | 0.003 | 0.004 | 52.143 | 4337.595 | -0.001    |        |
| Vaginal         | BV                           | 25 | Healthy          | 99.265  | 0.176 | 0.118 | 0.012  | -4.814   | 67.500    | -0.062 |
|                 |                              |    | BV               | 100.000 | 0.500 | 0.500 | 0.000  | 0.000    | 0.000     | -0.333 |
| Semen           | Infertile<br>(Genus level)   | 26 | Normal           | 99.474  | 0.150 | 0.100 | 0.009  | -5.672   | 94.500    | -0.053 |
|                 |                              |    | Subnormal        | 100.000 | 0.091 | 0.091 | 0.000  | 0.000    | 0.000     | -0.048 |
|                 |                              |    | Abnormal         | 100.000 | 0.071 | 0.071 | 0.000  | 0.000    | 0.000     | -0.037 |
|                 | Infertile<br>(Species level) |    | Normal           | 99.993  | 0.012 | 0.002 | 0.000  | 105.660  | 33899.677 | -0.001 |
|                 |                              |    | Subnormal        | 99.997  | 0.007 | 0.002 | 0.000  | 112.384  | 35971.995 | -0.001 |
|                 |                              |    | Abnormal         | 99.998  | 0.006 | 0.002 | 0.000  | 102.264  | 55854.225 | -0.001 |
| <b>Healthy</b>  |                              |    | <b>Mean</b>      | 95.506  | 0.126 | 0.049 | 0.003  | -25.693  | 22119.667 | -0.041 |
|                 |                              |    | <b>Std. Err.</b> | 2.924   | 0.045 | 0.032 | 0.001  | 14.768   | 12064.204 | 0.032  |
| <b>Diseased</b> |                              |    | <b>Mean</b>      | 97.065  | 0.109 | 0.037 | 0.003  | -22.651  | 25354.820 | -0.022 |
|                 |                              |    | <b>Std. Err.</b> | 1.429   | 0.029 | 0.016 | 0.001  | 15.350   | 14832.102 | 0.010  |



**Table S13.** The *observed* number of shared core nodes between the healthy (H) and diseased (D) treatments in the 25 MAD (microbiome associated disease) datasets (Related to Figs 6-7)

| Microbiome                       | Disease                          | Index       | Healthy               | Diseased        | Number of Core Nodes in Healthy | Number of Core Nodes in Diseased | Shared Core Nodes | % of Core Nodes in terms of Healthy | % of Core Nodes in terms of Diseased |
|----------------------------------|----------------------------------|-------------|-----------------------|-----------------|---------------------------------|----------------------------------|-------------------|-------------------------------------|--------------------------------------|
| Gut                              | IBD (Inflammatory Bowel Disease) | 1           | Healthy               | CD              | 36                              | 15                               | 1                 | 2.78                                | 6.67                                 |
|                                  |                                  |             | Healthy               | UC              | 36                              | 54                               | 1                 | 2.78                                | 1.85                                 |
|                                  | Obesity                          | 3           | Lean                  | Overweight      | 38                              | 53                               | 1                 | 2.63                                | 1.89                                 |
|                                  |                                  |             | Lean                  | Obesity         | 38                              | 257                              | 10                | 26.32                               | 3.89                                 |
|                                  | Cancer                           | 4           | Healthy               | Cancer          | 280                             | 182                              | 9                 | 3.21                                | 4.95                                 |
|                                  | HIV                              | 5           | Negative              | Treatment       | 278                             | 413                              | 22                | 7.91                                | 5.33                                 |
|                                  |                                  |             | Negative              | Non-treatment   | 278                             | 382                              | 24                | 8.63                                | 6.28                                 |
|                                  |                                  | 6           | Negative              | Treatment       | 246                             | 198                              | 15                | 6.10                                | 7.58                                 |
|                                  |                                  |             | Negative              | Non-treatment   | 246                             | 185                              | 11                | 4.47                                | 5.95                                 |
|                                  | 7                                | Negative    | Positive              | 175             | 145                             | 22                               | 12.57             | 15.17                               |                                      |
|                                  | T1D (Lean)                       | 8           | Healthy               | T1D             | 129                             | 147                              | 10                | 7.75                                | 6.80                                 |
|                                  | T1D (Obesity)                    |             | Healthy               | T1D             | 167                             | 168                              | 20                | 11.98                               | 11.90                                |
|                                  | Gout                             | 9           | Healthy               | Gout            | 109                             | 105                              | 1                 | 0.92                                | 0.95                                 |
|                                  | MHE                              | 10          | Healthy               | MHE             | 61                              | 43                               | 6                 | 9.84                                | 13.95                                |
|                                  |                                  |             | Control               | MHE             | 76                              | 43                               | 3                 | 3.95                                | 6.98                                 |
| Parkinson's Disease              | 11                               | Healthy     | PD                    | 164             | 386                             | 38                               | 23.17             | 9.84                                |                                      |
| Schizophrenia                    | 12                               | Healthy     | Schizophrenia         | 271             | 257                             | 30                               | 11.07             | 11.67                               |                                      |
| Autism                           | 13                               | Healthy     | Autism                | 52              | 79                              | 3                                | 5.77              | 3.80                                |                                      |
|                                  |                                  | Healthy     | Neurotypical          | 52              | 65                              | 0                                | 0.00              | 0.00                                |                                      |
| Atherosclerosis                  | 14                               | Healthy     | Atherosclerosis       | 236             | 283                             | 29                               | 12.29             | 10.25                               |                                      |
| Oral                             | Atherosclerosis                  | 15          | Healthy               | Atherosclerosis | 12                              | 35                               | 0                 | 0.00                                | 0.00                                 |
|                                  | Periodontitis                    | 16          | Healthy               | PB              | 14                              | 13                               | 1                 | 7.14                                | 7.69                                 |
|                                  |                                  |             | Healthy               | PnB             | 14                              | 6                                | 0                 | 0.00                                | 0.00                                 |
|                                  |                                  | 17          | Healthy               | Disease         | 198                             | 728                              | 15                | 7.58                                | 2.06                                 |
|                                  | Control                          |             | Disease               | 628             | 728                             | 0                                | 0.00              | 0.00                                |                                      |
|                                  | Smoking                          | 18          | Non-smoking           | Smoking         | 79                              | 67                               | 4                 | 5.06                                | 5.97                                 |
| 19                               |                                  | Non-smoking | Smoking               | 97              | 156                             | 20                               | 20.62             | 12.82                               |                                      |
| 20                               |                                  | Non-smoking | Smoking               | 21              | 28                              | 0                                | 0.00              | 0.00                                |                                      |
| Skin                             | Psoriasis                        | 21          | Control               | Lesion          | 446                             | 508                              | 84                | 18.83                               | 16.54                                |
|                                  |                                  |             | Normal                | Lesion          | 499                             | 508                              | 109               | 21.84                               | 21.46                                |
| Lung                             | Cystic Fibrosis (CF)             | 22          | End of Treatment      | Exacerbation    | 2                               | 2                                | 0                 | 0.00                                | 0.00                                 |
|                                  |                                  |             | 23                    | Healthy         | CF                              | 6                                | 5                 | 0                                   | 0.00                                 |
|                                  | HIV                              | 24          | Negative              | Positive        | 804                             | 338                              | 181               | 22.51                               | 53.55                                |
| Vaginal                          | BV                               | 25          | Healthy               | BV              | 6                               | 2                                | 0                 | 0.00                                | 0.00                                 |
| Semen                            | Infertile (Genus level)          | 26          | Normal                | Subnormal       | 5                               | 5                                | 1                 | 20.00                               | 20.00                                |
|                                  |                                  |             | Normal                | Abnormal        | 5                               | 6                                | 0                 | 0.00                                | 0.00                                 |
|                                  | Infertile (Species level)        |             | Normal                | Subnormal       | 429                             | 473                              | 69                | 16.08                               | 14.59                                |
|                                  |                                  |             | Normal                | Abnormal        | 429                             | 519                              | 67                | 15.62                               | 12.91                                |
| <b>Mean &amp; Standard Error</b> |                                  |             | <b>Mean</b>           |                 | 175.32                          | 199.66                           | 21.24             | 8.41                                | 7.98                                 |
|                                  |                                  |             | <b>Standard Error</b> |                 | 31.13                           | 33.59                            | 5.98              | 1.29                                | 1.58                                 |

**Table S14.** The *observed* number of shared periphery nodes between the healthy and diseased treatments in the 25 MAD (microbiome associated disease) datasets (Related to Figs 6-7)

| Microbiome                       | Disease                          | Index       | Healthy               | Diseased        | Number of Periphery Nodes in Healthy | Number of Periphery Nodes in Diseased | Shared Periphery Nodes | % of Periphery Nodes in terms of Healthy | % of Periphery Nodes in terms of Diseased |
|----------------------------------|----------------------------------|-------------|-----------------------|-----------------|--------------------------------------|---------------------------------------|------------------------|------------------------------------------|-------------------------------------------|
| Gut                              | IBD (Inflammatory Bowel Disease) | 1           | Healthy               | CD              | 80                                   | 71                                    | 7                      | 8.75                                     | 9.86                                      |
|                                  |                                  |             | Healthy               | UC              | 80                                   | 103                                   | 9                      | 11.25                                    | 8.74                                      |
|                                  | Obesity                          | 3           | Lean                  | Overweight      | 114                                  | 134                                   | 12                     | 10.53                                    | 8.96                                      |
|                                  |                                  |             | Lean                  | Obesity         | 114                                  | 281                                   | 23                     | 20.18                                    | 8.19                                      |
|                                  | Cancer                           | 4           | Healthy               | Cancer          | 316                                  | 266                                   | 11                     | 3.48                                     | 4.14                                      |
|                                  | HIV                              | 5           | Negative              | Treatment       | 328                                  | 416                                   | 43                     | 13.11                                    | 10.34                                     |
|                                  |                                  |             | Negative              | Non-treatment   | 328                                  | 440                                   | 27                     | 8.23                                     | 6.14                                      |
|                                  |                                  | 6           | Negative              | Treatment       | 306                                  | 250                                   | 25                     | 8.17                                     | 10.00                                     |
|                                  |                                  |             | Negative              | Non-treatment   | 306                                  | 263                                   | 23                     | 7.52                                     | 8.75                                      |
|                                  | 7                                | Negative    | Positive              | 219             | 189                                  | 18                                    | 8.22                   | 9.52                                     |                                           |
|                                  | T1D (Lean)                       | 8           | Healthy               | T1D             | 174                                  | 159                                   | 19                     | 10.92                                    | 11.95                                     |
|                                  | T1D (Obesity)                    |             | Healthy               | T1D             | 192                                  | 190                                   | 28                     | 14.58                                    | 14.74                                     |
|                                  | Gout                             | 9           | Healthy               | Gout            | 156                                  | 136                                   | 17                     | 10.90                                    | 12.50                                     |
|                                  | MHE                              | 10          | Healthy               | MHE             | 136                                  | 107                                   | 6                      | 4.41                                     | 5.61                                      |
| Control                          |                                  |             | MHE                   | 144             | 107                                  | 12                                    | 8.33                   | 11.21                                    |                                           |
| Parkinson's Disease              | 11                               | Healthy     | PD                    | 218             | 376                                  | 40                                    | 18.35                  | 10.64                                    |                                           |
| Schizophrenia                    | 12                               | Healthy     | Schizophrenia         | 282             | 302                                  | 26                                    | 9.22                   | 8.61                                     |                                           |
| Autism                           | 13                               | Healthy     | Autism                | 105             | 150                                  | 9                                     | 8.57                   | 6.00                                     |                                           |
|                                  |                                  | Healthy     | Neurotypical          | 105             | 109                                  | 4                                     | 3.81                   | 3.67                                     |                                           |
| Atherosclerosis                  | 14                               | Healthy     | Atherosclerosis       | 253             | 283                                  | 23                                    | 9.09                   | 8.13                                     |                                           |
| Oral                             | Atherosclerosis                  | 15          | Healthy               | Atherosclerosis | 43                                   | 68                                    | 2                      | 4.65                                     | 2.94                                      |
|                                  | Periodontitis                    | 16          | Healthy               | PB              | 41                                   | 32                                    | 2                      | 4.88                                     | 6.25                                      |
|                                  |                                  |             | Healthy               | PnB             | 41                                   | 38                                    | 2                      | 4.88                                     | 5.26                                      |
|                                  |                                  | 17          | Healthy               | Disease         | 201                                  | 690                                   | 14                     | 6.97                                     | 2.03                                      |
|                                  | Control                          |             | Disease               | 585             | 690                                  | 0                                     | 0.00                   | 0.00                                     |                                           |
|                                  | Smoking                          | 18          | Non-smoking           | Smoking         | 130                                  | 108                                   | 13                     | 10.00                                    | 12.04                                     |
| Non-smoking                      |                                  |             | Smoking               | 151             | 201                                  | 20                                    | 13.25                  | 9.95                                     |                                           |
| 20                               |                                  | Non-smoking | Smoking               | 81              | 121                                  | 16                                    | 19.75                  | 13.22                                    |                                           |
| Skin                             | Psoriasis                        | 21          | Control               | Lesion          | 452                                  | 506                                   | 94                     | 20.80                                    | 18.58                                     |
|                                  |                                  |             | Normal                | Lesion          | 517                                  | 506                                   | 106                    | 20.50                                    | 20.95                                     |
| Lung                             | Cystic Fibrosis (CF)             | 22          | End of Treatment      | Exacerbation    | 0                                    | 6                                     | 0                      | NA                                       | 0.00                                      |
|                                  |                                  |             | Healthy               | CF              | 23                                   | 25                                    | 1                      | 4.35                                     | 4.00                                      |
|                                  | HIV                              | 24          | Negative              | Positive        | 816                                  | 345                                   | 118                    | 14.46                                    | 34.20                                     |
| Vaginal                          | BV                               | 25          | Healthy               | BV              | 11                                   | 2                                     | 0                      | 0.00                                     | 0.00                                      |
| Semen                            | Infertile (Genus level)          | 26          | Normal                | Subnormal       | 15                                   | 17                                    | 0                      | 0.00                                     | 0.00                                      |
|                                  |                                  |             | Normal                | Abnormal        | 15                                   | 22                                    | 4                      | 26.67                                    | 18.18                                     |
|                                  | Normal                           |             | Subnormal             | 428             | 553                                  | 63                                    | 14.72                  | 11.39                                    |                                           |
|                                  | Normal                           |             | Abnormal              | 428             | 545                                  | 51                                    | 11.92                  | 9.36                                     |                                           |
| <b>Mean &amp; Standard Error</b> |                                  |             | <b>Mean</b>           |                 | 208.79                               | 231.76                                | 23.37                  | 10.15                                    | 9.11                                      |
|                                  |                                  |             | <b>Standard Error</b> |                 | 29.40                                | 31.41                                 | 4.65                   | 1.02                                     | 1.06                                      |

**Table S15.** The *observed* number of shared skeletons with  $HSS > 0$  between the healthy and diseased treatments in the 25 MAD (microbiome associated disease) datasets (Related to Figs 6-7)

| Microbiome                       | Disease                          | Index   | Healthy               | Diseased        | Number of Edges in Healthy | Number of Edges Diseased | Shared Edges | % of Edges in terms of Healthy | % of Edges in terms of Diseased |
|----------------------------------|----------------------------------|---------|-----------------------|-----------------|----------------------------|--------------------------|--------------|--------------------------------|---------------------------------|
| Gut                              | IBD (Inflammatory Bowel Disease) | 1       | Healthy               | CD              | 6669                       | 3653                     | 49           | 0.73                           | 1.34                            |
|                                  |                                  |         | Healthy               | UC              | 6669                       | 12244                    | 80           | 1.20                           | 0.65                            |
|                                  | Obesity                          | 3       | Lean                  | Overweight      | 11470                      | 17390                    | 166          | 1.45                           | 0.95                            |
|                                  |                                  |         | Lean                  | Obesity         | 11470                      | 105694                   | 1132         | 9.87                           | 1.07                            |
|                                  | Cancer                           | 4       | Healthy               | Cancer          | 177296                     | 100128                   | 630          | 0.36                           | 0.63                            |
|                                  | HIV                              | 5       | Negative              | Treatment       | 183240                     | 343199                   | 6984         | 3.81                           | 2.03                            |
|                                  |                                  |         | Negative              | Non-treatment   | 183240                     | 337262                   | 3762         | 2.05                           | 1.12                            |
|                                  |                                  | 6       | Negative              | Treatment       | 152069                     | 100127                   | 2718         | 1.79                           | 2.71                            |
|                                  | Negative                         |         | Non-treatment         | 152069          | 100127                     | 1934                     | 1.27         | 1.93                           |                                 |
|                                  | T1D (Lean)                       | 8       | Healthy               | T1D             | 45752                      | 46663                    | 1059         | 2.31                           | 2.27                            |
|                                  |                                  |         | Healthy               | T1D             | 64261                      | 63902                    | 3393         | 5.28                           | 5.31                            |
|                                  | T1D (Obesity)                    | 8       | Healthy               | T1D             | 64261                      | 63902                    | 3393         | 5.28                           | 5.31                            |
|                                  | Gout                             | 9       | Healthy               | Gout            | 34962                      | 28916                    | 407          | 1.16                           | 1.41                            |
|                                  | MHE                              | 10      | Healthy               | MHE             | 19306                      | 11175                    | 172          | 0.89                           | 1.54                            |
| Control                          |                                  |         | MHE                   | 24089           | 11175                      | 309                      | 1.28         | 2.77                           |                                 |
| Parkinson's Disease              | 11                               | Healthy | PD                    | 64123           | 173070                     | 3630                     | 5.66         | 2.10                           |                                 |
| Schizophrenia                    | 12                               | Healthy | Schizophrenia         | 152628          | 155959                     | 4861                     | 3.18         | 3.12                           |                                 |
| Autism                           | 13                               | Healthy | Autism                | 12245           | 23827                      | 43                       | 0.35         | 0.18                           |                                 |
|                                  |                                  | Healthy | Neurotypical          | 12245           | 15043                      | 24                       | 0.20         | 0.16                           |                                 |
| Atherosclerosis                  | 14                               | Healthy | Atherosclerosis       | 119315          | 159894                     | 4288                     | 3.59         | 2.68                           |                                 |
| Oral                             | Atherosclerosis                  | 15      | Healthy               | Atherosclerosis | 1485                       | 5253                     | 2            | 0.13                           | 0.04                            |
|                                  | Periodontitis                    | 16      | Healthy               | PB              | 1485                       | 989                      | 1            | 0.07                           | 0.10                            |
|                                  |                                  |         | Healthy               | PnB             | 1485                       | 945                      | 1            | 0.07                           | 0.11                            |
|                                  |                                  | 17      | Healthy               | Disease         | 79400                      | 1004652                  | 1353         | 1.70                           | 0.13                            |
|                                  | Control                          |         | Disease               | 735077          | 1004652                    | 0                        | 0.00         | 0.00                           |                                 |
|                                  | Smoking                          | 18      | Non-smoking           | Smoking         | 21735                      | 15224                    | 279          | 1.28                           | 1.83                            |
| 19                               |                                  |         | Non-smoking           | Smoking         | 21745                      | 58222                    | 1707         | 7.85                           | 2.93                            |
| 20                               |                                  |         | Non-smoking           | Smoking         | 5101                       | 10841                    | 153          | 3.00                           | 1.41                            |
| Skin                             | Psoriasis                        | 21      | Control               | Lesion          | 387400                     | 485669                   | 37098        | 9.58                           | 7.64                            |
|                                  |                                  |         | Normal                | Lesion          | 488439                     | 485669                   | 64145        | 13.13                          | 13.21                           |
| Lung                             | Cystic Fibrosis (CF)             | 22      | End of Treatment      | Exacerbation    | 1                          | 28                       | 0            | 0.00                           | 0.00                            |
|                                  |                                  |         | 23                    | Healthy         | CF                         | 406                      | 434          | 0                              | 0.00                            |
|                                  | HIV                              | 24      | Negative              | Positive        | 171801                     | 214879                   | 19746        | 11.49                          | 9.19                            |
| Vaginal                          | BV                               | 25      | Healthy               | BV              | 135                        | 6                        | 0            | 0.00                           | 0.00                            |
| Semen                            | Infertile (Genus level)          | 26      | Normal                | Subnormal       | 189                        | 231                      | 3            | 1.59                           | 1.30                            |
|                                  |                                  |         | Normal                | Abnormal        | 189                        | 378                      | 6            | 3.17                           | 1.59                            |
|                                  | Normal                           |         | Subnormal             | 366772          | 525807                     | 26291                    | 7.17         | 5.00                           |                                 |
|                                  | Normal                           |         | Abnormal              | 366772          | 565507                     | 24225                    | 6.60         | 4.28                           |                                 |
| <b>Mean &amp; Standard Error</b> |                                  |         | <b>Mean</b>           |                 | 109477.68                  | 164327.1                 | 5597.37      | 3.05                           | 2.27                            |
|                                  |                                  |         | <b>Standard Error</b> |                 | 26413.27                   | 41954.41                 | 2086.53      | 0.57                           | 0.45                            |

## Supplementary Figs S1-S3

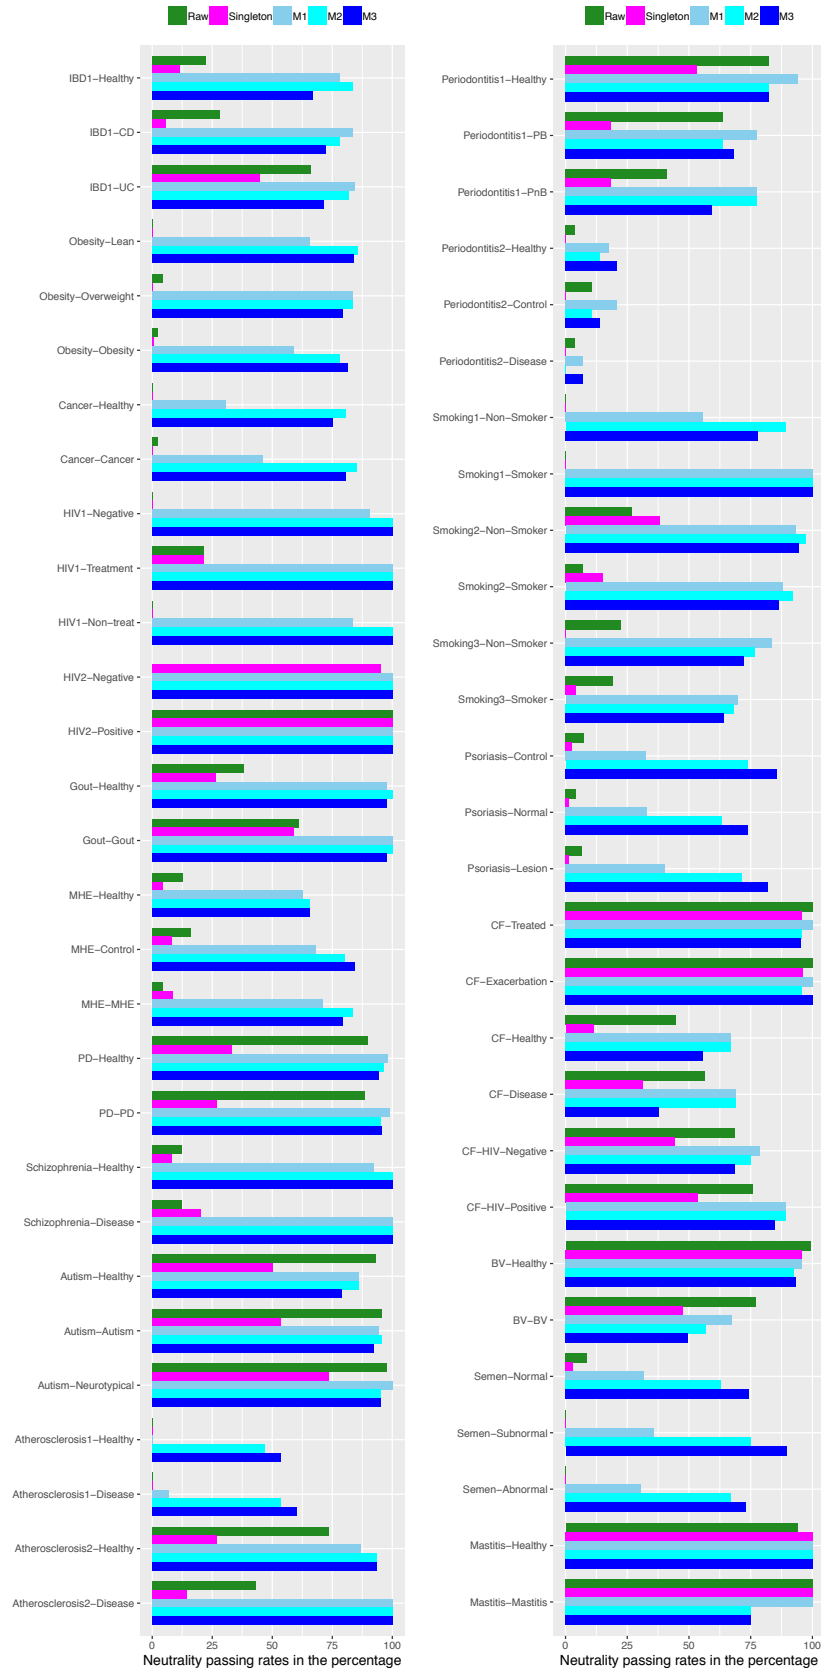

**Fig S1.** The neutrality passing rates for each of the 24 case studies: for each case, the test results for five data pre-processing schemes are plotted (Related to Fig 2).

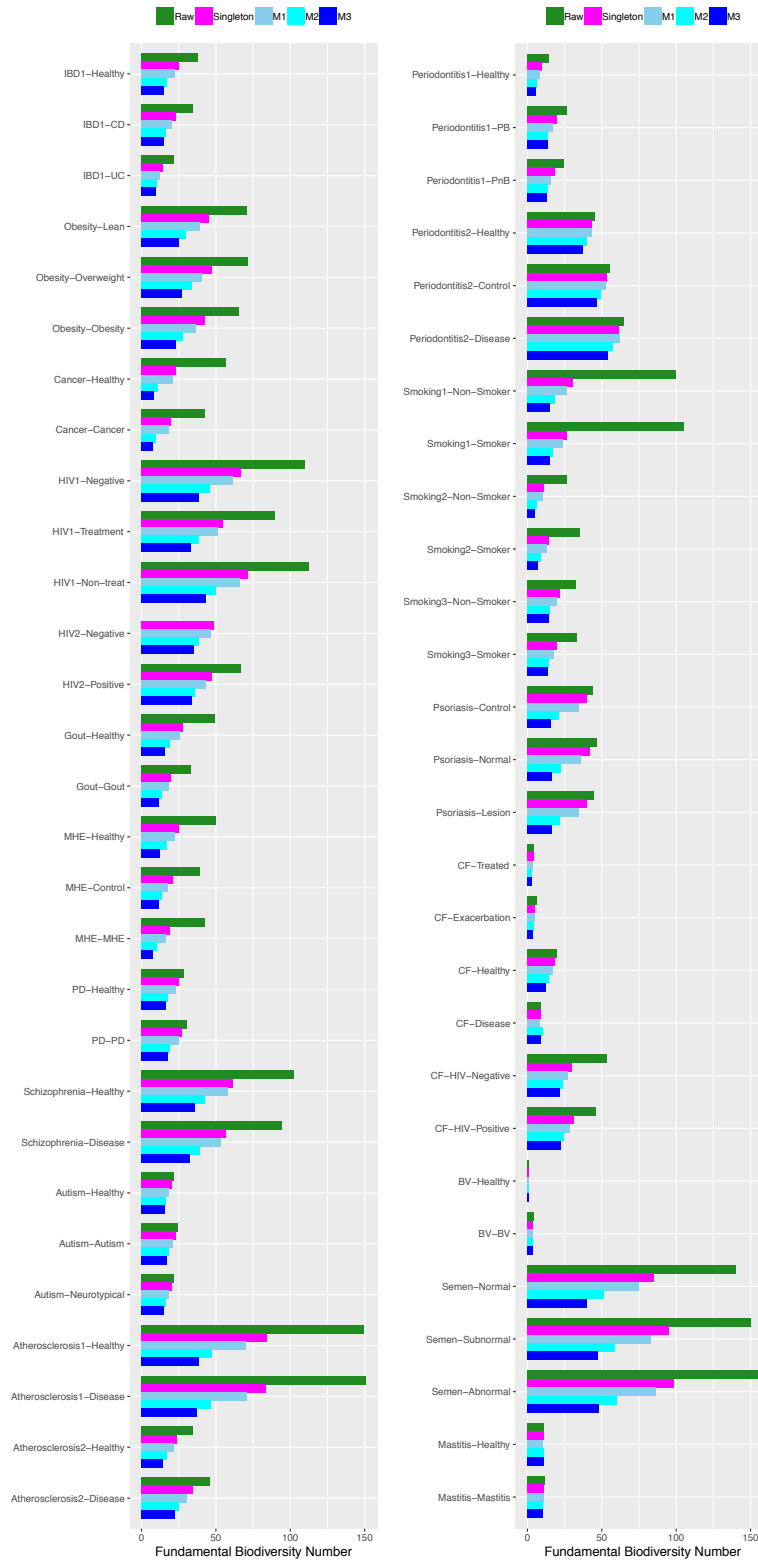

**Fig S2.** The fundamental diversity number ( $\theta$ ) for each of the 24 case studies: for each case study, the test results for five data pre-processing schemes are plotted (Related to Fig 3).

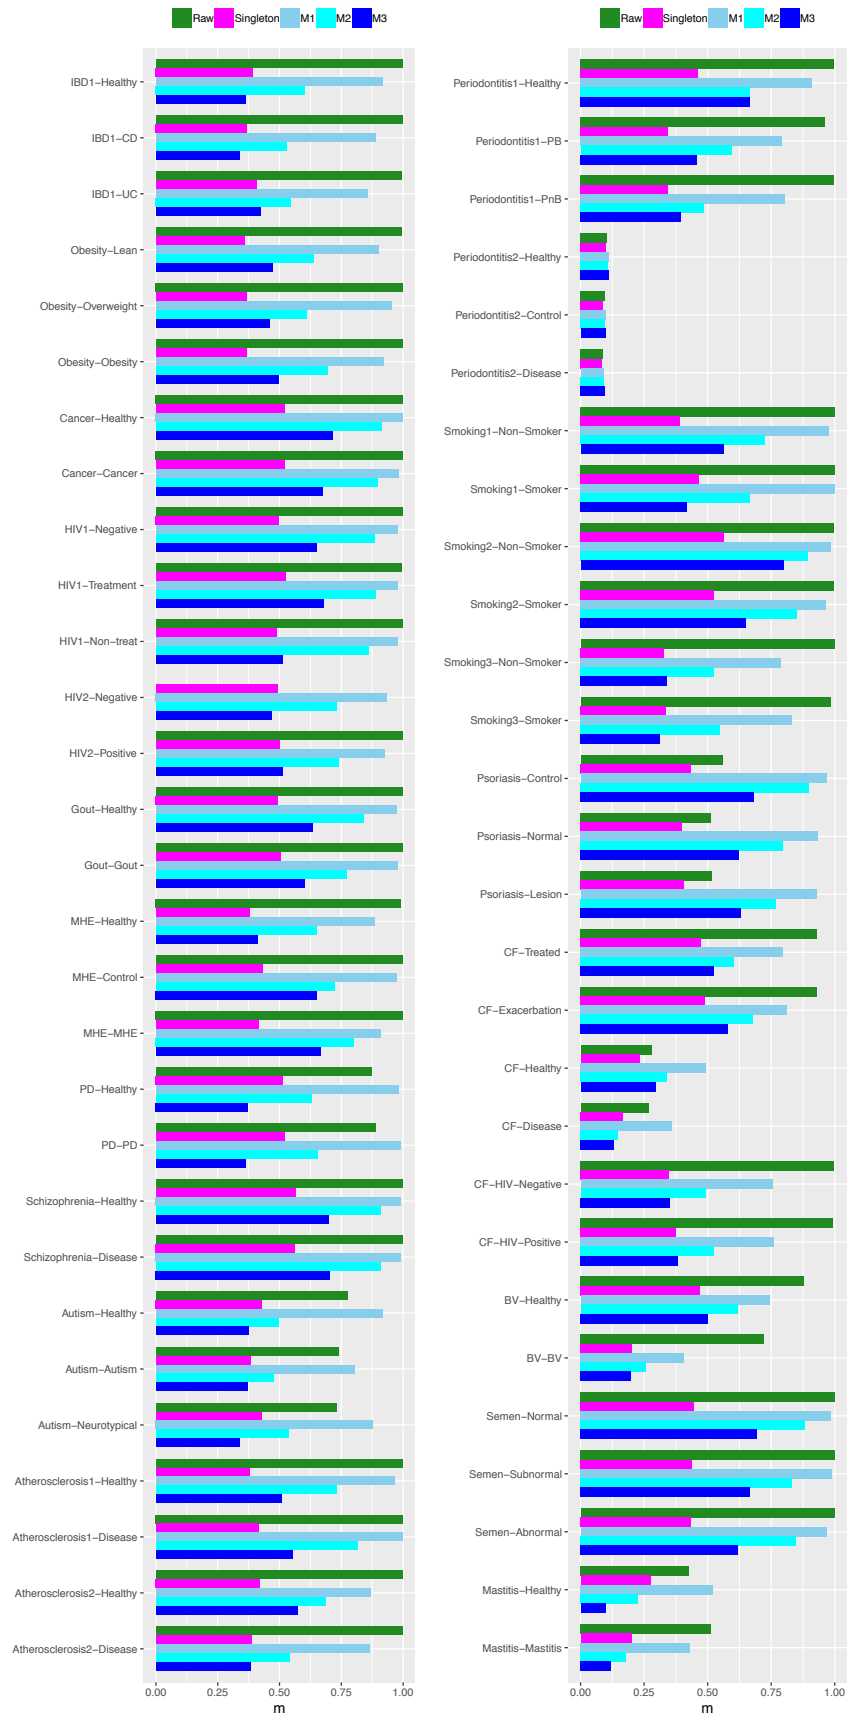

**Fig S3.** The immigration probability ( $m$ ) (fundamental dispersal number) for each of the 24 case studies, for each case study, the test results for five data pre-processing schemes are plotted (Related to Fig 3).

# Transparent Methods

## Datasets of Human Microbiome Associated Diseases

A brief description on the metagenomic datasets of the 27 MAD (microbiome associated disease) studies is provided in Table S1 of the online supplementary information (OSI), which are the same datasets used in Ma *et al.* (2019). Among the 27 datasets, there were 3 and 2 datasets that are not suitable for the neutral-theoretic analysis and CPN/HSN analyses, respectively, and therefore were excluded from the analyses of this study. The 27 case studies cover most of the high-profile MAD including obesity, IBD, diabetes, BV (bacterial vaginosis), periodontitis, and neurodegenerative diseases. The datasets were in the abundance of 16s-rRNA reads clustered at the species level (97% similarity level), equivalent with the species abundance tables in microbial ecology.

## Hubbell's unified neutral theory of biodiversity (UNTB)

Hubbell (2001) classic neutral theory describes a local community containing  $J$  individuals, one of which, randomly chosen, dies and is replaced at every time step. Two ways the individual is replaced are: an offspring of another randomly chosen individual from the local community, occurring with probability  $(1-m)$ , or offspring from a randomly chosen individual from an outside pool of individuals (metacommunity) with probability  $m$ . The metacommunity is a well-mixed source pool of individual organisms; each individual has the potential to reproduce offspring migrated to the local community being studied. Neutral theory assumes that the species abundance distribution (SAD) of metacommunity is governed by a similar neutral process. The replacement individuals in the metacommunity are offspring from a randomly chosen individual in the metacommunity, or from speciation (which occurs with probability  $\nu$ ). Obviously, in previous description of community dynamics (birth, death, migration, speciation), all individuals are assumed to be equivalent and are distinguished only by their species labels. The species labels are preserved solely for describing SAD.

The neutral theory is formulated as a sampling theory, which takes into account the effect of sampling a small proportion from the much larger natural system (sampling space). The mathematical model used to describe the neutral process is multi-nominal distribution, which can be mechanistically derived from a master equation—a differential equation that describes the community dynamics based on the neutral principles. It makes predictions about SADs, which can be statistically tested against observed species abundances data obtained from sampling actual communities. In the following, we briefly describe the parameters and statistical tests used in testing the neutrality for a sole purpose to interpret the results from our analysis.

The total number of individuals of all species in a local community (represented as  $J$ ) is the local community size. In our case, it is the total number of 16s-rRNA reads of all OTUs from a community sample. The UNTB assumes a finite community size.

The number of species ( $S$ ) in the community may change due to speciation, extinction and immigration from meta-community.

The fundamental biodiversity number ( $\theta$ ) is actually a measure of speciation, which can be seen from its definition,  $\theta = J_M [\nu / (1 - \nu)]$ , where  $J_M$  is the number of individuals in the metacommunity and  $\nu$  is the per capita speciation rate. Therefore, the fundamental biodiversity number ( $\theta$ ) represents the speciation process in Vellend (2010) & Hanson et al. (2012) synthesis for community patterns.

The immigration probability ( $m$ ) is a measure for *dispersal limitation*, and it is defined as  $m=I/(I+J-1)$ , where  $I$  is the number of immigrants that are searching for vacant spot in the local community (*i.e.*, competing with the local individuals), and  $J$  is the number of individuals as mentioned previously. Dispersal limitation is a process that causes the location of an individual to be limited in some sense by the location of its parent (Rosindell *et al.* 2011). The immigration probability ( $m$ ) therefore, characterizes the dispersal process in Vellend (2010) and Hanson *et al.* (2012) synthesis for community ecology.

Etienne's (2005, 2007) exact neutrality test adopts a mixture test strategy of Monte Carlo (simulation) significance test and the parametric bootstrap. The test is 'exact' since type I error can be *exactly* specified. It compares the probability (the likelihood) of the realized or observed configuration (*i.e.*, SAD of actually sampled community) with the probabilities of the artificially simulated configurations based on the neutral theory model by using a Chi-squared test. If the  $p$ -value from the test is  $p>0.05$ , we conclude that the neutrality of the community under testing cannot be rejected, and that the observed SAD is consistent with the prediction from the neutral theory, *i.e.*, passing the neutrality test.

To apply Hubbell's (2001) UNTB for measuring the effects of drift, speciation and dispersal (Rosindell *et al.* 2011), we adopted Etienne (2005) sampling formula (distribution model) and a standard R-package UNTB by Hankin (2007) that implemented Etienne (2005) exact probability test procedure. An illustration of testing the neutrality of the human microbiome is provided in Li & Ma (2015).

In consideration of the potential influence of sequencing errors on the neutrality test, we removed singleton (removing the OTUs represented by a single read), minus one, two, and three reads across all OTUs, respectively. We also included the test with "raw" OTU reads, *i.e.*, without removing any reads from the OTU tables computed from standard bioinformatics pipelines used in Ma *et al.* (2019). That is, a total of five tests are performed for each community sample based on five different data pre-processing schemes to enhance the robustness of our analysis.

*Fisher's exact probability test* is designed to compare the frequency of occurrences (observations) in a fourfold table setting when the numbers are too small to use the Chi-square test (Fisher 1922, 1954). We use Fisher's exact probability test to determine if there are pair-wise differences between the treatments (the healthy and diseased) in their passing rates of the neutrality test. We used the R-function (`fisher.test`) from the standard R-package (`stats`) (<http://stat.ethz.ch/R-manual/R-patched/library/stats/html/fisher.test.html>) to conduct the Fisher's exact test in this study. Note that the step of Fisher's exact test was performed after the FDR (false discovery rate, *i.e.*, multiple testing corrections) control for the  $p$ -values from Etienne's (2005) neutrality test of Hubbell's (2001) UNTB.

### **Ning et al. (2019) framework for quantifying ecological stochasticity**

We use a new framework recently developed by Ning *et al.* (2019) for quantifying ecological stochasticity to cross-verify the results from neutral theory modeling. The theoretical basis of their mathematical framework is that deterministic processes should drive ecological communities more similar or dissimilar than null expectation, and they formulated a sophisticated procedure to implement a null model for quantifying stochasticity. Our motivation to apply Ning *et al.* (2019) framework for estimating community stochasticity level is to cross-verify the findings from Hubbell's UNTB, especially to determine a possible ceiling limit for stochasticity given that UNTB model tended to overestimate the stochastic neutral processes.



Technically, this is possible since the normalized stochasticity ratio (NSR) of Ning *et al.* (2019) is a dimensionless metric in percentages or between 0 and 1. The NSR represents for the *strength of stochasticity* in the community assembly, and should range from 0 to 100%. If the community assembly is extremely deterministic without any stochasticity, then NSR should be 0%; otherwise SR should be 100%. However, when expected stochasticity is very low, NSR could overestimate stochasticity (Ning *et al.* 2019).

## Core/periphery network (CPN)

Given that network analysis has been widely applied to microbiome research (*e.g.*, Faust *et al.* 2012, Faust & Raes 2012, Kurtz *et al.* 2015, Ma & Ye 2017, Xiao *et al.* 2017, Röttjers & Faust 2018, Ma & Ellison 2019), what are special with CPN or HSN (*see* next sub-section)? Informally, the network core usually denotes a centrally and densely connected set of network nodes, while the network periphery refers to a sparsely connected, usually non-central set of nodes that are linked to the core (Csermely *et al.* 2013). Ecological communities/systems are typical complex systems (networks), which can be formulated as core/periphery network (CPN). More recent studies established that network cores promotes system robustness and evolvability, which can help system to adapt to large fluctuations of the environment, as well as to noise of intrinsic processes (Csermely *et al.* 2013). The core/periphery structure was found to be ubiquitous in the species dominance network of the human vaginal microbiome and the structure plays an important role in controlling the community diversity-stability relationships (Ma & Ellison 2019). For example, an extensive core (extensively large core size) allows for a more resilient network (community) but could be more difficult to control.

According to Csermely *et al.* (2013), a perfect or ideal core/periphery network consists of a fully linked core and a periphery that is fully connected to the core, but none of the periphery nodes are connected with each other. Formally, let  $G=(V, E)$  be an undirected, unweighted graph with  $n$  nodes and  $m$  edges, and let  $A=(a_{ij})$  is the adjacency matrix of  $G$ , where  $a_{ij}=1$  if node  $i$  & node  $j$  are linked and 0 otherwise. Let  $\delta$  be a vector of length  $n$  with entries of 1 or 0, if the corresponding node belongs to the core or the periphery, respectively. Additionally, let  $P=(p_{ij})$  be the adjacency matrix of the ideal or perfect core/periphery network of  $n$  nodes and  $m$  edges. The detection of core-periphery structure is an optimization problem to find the vector  $\delta$  such that the objective function ( $\rho$ ) achieves its maximum. With the vector  $\delta$ , it is then trivial to classify nodes into either core or periphery.

$$\rho = \sum_{i,j} A_{ij}P_{ij} \quad (1)$$

When applied to the human microbiome, the CPN structures reflect the heterogeneity or asymmetry of species (OTUs) from node perspective. In terms of the Vellend-Hanson four-processes synthesis (Vellend 2010, Hanson *et al.* 2012), which states that drift, speciation, dispersal, and selection are the underlying processes or mechanisms shaping community diversity patterns and driving community dynamics, the heterogeneity or asymmetry of species (nodes) revealed by CPN represents for the effects of *selection*. Therefore, at least, conceptually, the CPN analysis offers a framework to investigate the effects of selection from node perspective.

More importantly, the core/periphery (nodes or species) can be considered as critical network structures, and we postulate that they should be more sensitive to disturbances including MADs. In the present study, we mainly perform two kinds of statistical tests with CPNs. The first is to conduct shared core/periphery analysis, which assesses and interprets the effects of MADs on the possible increase or decrease of shared core/periphery between the healthy and diseased

individuals. The second is to test the differences between the healthy and diseased individuals in the properties of critical network structures.

## High-salience skeleton network (HSN) and network assortativity

While core/periphery network distinguishes the different structural and functional roles between core and periphery nodes (species), the high-salience skeleton network (HSN) makes distinctions among the links (edges). Arguably the most important reason (also the advantage) why network analysis has been experiencing explosion is its capacity in reducing the *complexity* of complex systems (networks) while preserving their certain key features. In other words, network analysis can shed critical lights on complex networks by reducing complexity and leveraging the information from the key features. The HSN allows us to focus on critical paths (interactions) in complex networks (Grady *et al.* 2012, Shekhtman *et al.* 2014).

High salience skeletons or backbones reduce the number of links in the network while preserving the nodes (Grady *et al.* 2012, Shekhtman *et al.* 2014). However, reducing link complexity is particularly challenging because of the *mix* of link and node heterogeneity. In the case of human microbiome network, the heterogeneities of both nodes and links were equally significant, which is evidenced by the near universal fitting of the power law distributions to various network properties of nodes and links (Ma & Ellison 2019). Whether generic heterogeneous networks can be intrinsically segregated into qualitatively distinct clusters is still an open problem in network theory (Grady *et al.* 2012, Shekhtman *et al.* 2014). Grady *et al.* (2012) introduced the concept of link salience to deal with the problem, which measures the significance of a link and is based on an ensemble of node-specific perspectives of the network, and quantifies the extent to which a consensus among nodes exist regarding the importance of a link. The so-termed *high-salience skeletons* then constitute the backbones (“highways”) of the network.

Besides identifying backbones or highways in complex networks, another advantage of high salience skeleton network is its particular suitability for exploring the response of networks under different perturbations such as intentional attack and random failure. High salience network has been particularly successful in the studies of transportation networks, where skeletons (backbones) are responsible for carrying the majority of the traffic. When encountering perturbations such as traffic jams or natural disasters, backbones again are critical for transportation rerouting and cancellations to survive disasters (Grady *et al.* 2012, Shekhtman *et al.* 2014). In this study, MADs can be treated as perturbations at ecological time scale and as selection force at evolutionary time scale, which may not be separable according to Hanson *et al.* (2012) due to the fast-track evolution of microbes.

Link salience ( $s$ ) is defined based on the notion of shortest paths in weighted networks, *e.g.*, the species correlation network with the *inverse* of correlation coefficients as weights (Ma & Ellison 2019). Assume a weighted network defined by weight matrix  $w_{ij}$  and a shortest path between node  $x$  and  $y$ , the indicator function can be defined as:  $\sigma_{ij}(y, x) = 1$  if edge  $(i, j)$  is on the shortest path from  $x$  to  $y$ ,  $\sigma_{ij}(y, x) = 0$ , otherwise. A shortest path tree  $T(x)$  rooted at node  $x$  is described by a matrix with elements:  $T_{ij}(x) = 1$ , if  $\sum_y \sigma_{ij}(y, x) > 0$ ,  $T_{ij}(x) = 0$  otherwise. Link salience  $s_{ij}$  of edge  $(i, j)$  is computed with the following formula:

$$s_{ij} = \frac{1}{N} \sum_x T_{ij}(x) = \langle T_{ij}(x) \rangle_v \quad (2)$$

where  $\langle \bullet \rangle_v$  is the average across the set of root nodes  $x$ .

As explained previously, when applied to the human microbiome, the high salience skeletons (links) reflect the heterogeneity or asymmetry of species (OTUs) interactions from the link perspective. According to the four-process synthesis (Vellend 2010, Hanson *et al.* 2012), heterogeneity or asymmetry of species interactions or species interactions with their environments represents for the effects of *selection*, which can be revealed by the HSN introduced here from link perspective, cross-verified with the CPN from node perspective introduced previously.

Specifically, we will first test whether or not the *shared* high-salience skeletons between the healthy and diseased individuals are increased or decreased due to the disease effects, similar to the previously described shared core/periphery nodes analysis. Second, we will also test the properties of high-salience skeleton networks, which are critical network structures from link perspective, similar to the testing of properties of core/periphery network from node perspective. Furthermore, integrated with previous CPN analysis, the combined *shared analyses* of the core/periphery/skeleton structures, as well as testing the differences in the key properties of the core/periphery/skeleton networks, are expected to reveal the differences between the healthy and diseased individuals and identify potentially invaluable diagnosis and risk prediction indicators for MADs.

As to the CPN/HSN properties, we mention one particularly important network property, the *assortativity* coefficient. The property is important because it is highly relevant to network resilience, the loss of which is known as *dysbiosis* in the literature of human MADs. In assortative networks, the nodes with many connections tend to be connected to other nodes that also possess many connections (Newman 2002, 2003). The assortativity coefficient ( $r$ ) is a concept for measuring the homophily level of the graph (network). The homophily refers to resemblance due to common ancestry based on values (such as degree) assigned to vertices. A higher assortativity coefficient ( $r$ ) indicates that connected vertices tend to have more similar assigned values. For an undirected network, the assortativity based on vertex degree is defined as

$$r = \frac{1}{\sigma_q^2} \sum_{jk} jk(e_{jk} - q_j q_k), \quad (3)$$

where  $e_{jk}$  is the fraction of edges connecting vertices of type  $j$  and  $k$  (*i.e.*, vertices that have degrees  $j$  and  $k$ ),  $\sigma_q$  is the standard deviation of the distribution  $q_k$ , and  $q_k$  is equal to:  $q_k = \sum_j e_{jk}$ .

From eqn. (3), one can find that the  $r$  is equal to the Pearson's correlation coefficient of degree between pairs of linked nodes. The value of  $r$  lies in the range  $-1 \leq r \leq 1$ , with  $r = 1$  indicating perfect assortativity and  $r = -1$  indicating perfect disassortativity. When the value of  $r$  lies around 0, it is null or neutral result, meaning that it is not statistically different from zero. Assortative networks are more resilient against removal of their vertices, especially highest-degree vertices, than disassortative or neutral ( $r \approx 0$ ) networks. The above definition for assortativity index is based on general complex network such as species correlation network (SCN). In this study, we compute the assortativity ( $r_{HSS}$ ) for the high-salience skeleton networks based on the degree of high-salience skeletons (HSS) of vertices. Different from SCNs, the high-salience skeleton networks are typically disassortative (Grady 2012).

## Computational procedures/algorithms for CPN & HSN analyses

As introduced previously, two types of statistical tests, *i.e.*, the shared core/periphery/skeleton analyses between the healthy (H) and diseased (D) treatments (*i.e.*, test the change of shared critical network structures between the H & D treatments), as well as test the differences in key properties of the critical network structures between the H & D treatments. Both types of tests depend on the construction of CPN/HSN, which are built from species correlation networks

(SCN). The samples from both H & D treatments are randomly mixed before building SCN networks. From the randomly mixed (permuted) samples, 1000 pairs (pair=H vs. D) of permuted networks are constructed, and the  $p$ -values of the permutation tests for determining the significances of the differences (*i.e.*, disease effects) are computed from comparing the 1000 pairs of networks. Spearman's correlation coefficients with FDR (false discovery rate) control with  $p$ -value=0.001 are first used to construct SCNs. From the SCNs, the algorithms outlined in previous sections are applied to reconstruct the corresponding CPN and HSN networks. The computation procedures for building SCN can be found in Junker & Schreiber (2008) and Ma & Ye (2017), and those for building CPN/HSN can be found in Ma & Ellison (2019). Further information on the algorithms for performing the two types of statistical tests outline above is briefly introduced below:

## General outline for generating permuted networks for performing shared core/periphery/skeleton analyses and for testing the network properties

(1) Building 1000 sets (pairs) of healthy ( $H$ ) & diseased ( $D$ ) networks by randomly reshuffling the  $H$  and  $D$  samples for 1000 times using Spearman's rank correlation coefficients with FDR (false discovery control).

### A. For Shared Core/Periphery (Nodes) Analysis

(2A) Detect core/periphery nodes from the  $H$  &  $D$  networks built in (1), construct core/periphery networks (CPN), and compute shared core/periphery nodes between the  $H$  &  $D$  samples.

(3A) Perform permutation test with the 1000 permuted networks and test the change of shared core/periphery nodes between the  $H$  &  $D$  samples, based on the results from (2A).

### B. For Shared Skeleton (Edge or Link) Analysis

(2B) Detect high salience skeletons from the  $H$  &  $D$  networks built in (1), construct high salience skeleton networks (HSN), and compute the shared skeletons between the  $H$  &  $D$  samples.

(3B) Perform permutation test with the 1000 permuted networks and test the change of shared skeletons between the  $H$  &  $D$  samples, based on the results from (2B).

### C. Significance Test for Core/Periphery and Skeleton Networks Properties

Using the results from A & B to test the difference in the network properties by performing the standard permutation tests.

## Test Algorithms

### Algorithm for Shared Core/Periphery Analysis based on Permuted Networks

**Step [1]:** Assuming there are  $a$  samples from the healthy ( $H$ ) treatment, and  $b$  samples from the diseased ( $D$ ) treatment, compute the pair-wise Spearman's correlation coefficients for the  $a$  samples in the  $H$  and the  $b$  samples in the  $D$  treatment, respectively. Use FDR control with  $p=0.001$  to filter out insignificant correlations, and obtain the final correlation relationships for building the species correlation networks for the  $H$  and  $D$  treatments. From the two species correlation networks, detect the core/periphery nodes for each network, and compute the shared core/periphery nodes between the  $H$  &  $D$  networks, respectively. This step is no difference from regular core/periphery network analysis, until computing the shared core/periphery nodes.

The shared core/periphery nodes obtained from this *Step* [1] is the actually or *observed* shared core/periphery nodes.

**Step [2]:** Pool together all samples from  $H$  &  $D$  and perform random permutation of the combined  $(a+b)$  samples. Treat the first  $a$  samples as the permuted healthy treatment and the leftover  $b$  samples as the permuted diseased treatment.

According to the algorithm in *Step* [1], compute the shared core/periphery nodes for this specific pair of permuted  $H$  &  $D$  treatments.

**Step [3]:** Repeat *Step* [2] for 1000 times, and obtain 1000 sets of shared core/periphery nodes.

**Step [4]:** Compute a pseudo- $p$  value. Using the number of shared core nodes as example, assume the shared core nodes from **Step [1]** is  $N$ , the numbers of shared core nodes from the 1000 random permutations in *Step* [2-3] are  $N_1, N_2, \dots, N_i, \dots, N_{1000}$ , the pseudo- $p$  value is the proportion of the permutations with  $N_i > N$  among 1000 times of permutations. That is, assuming  $n$  is the number of times satisfying  $N_i > N$  in 1000 permutations,  $p = n/1000$ .

### **Algorithm for Shared Skeleton Analysis Based on Permuted Networks**

**Step [1]:** Assuming there are  $a$  samples from the healthy ( $H$ ) treatment, and  $b$  samples from the diseased ( $D$ ) treatment, compute the pair-wise Spearman's correlation coefficients for the  $a$  samples in the  $H$  and the  $b$  samples in the  $D$  treatment, respectively. Use FDR control with  $p=0.001$  to filter out insignificant correlations, and obtain the final correlation relationships for building the species correlation networks for the  $H$  and  $D$  treatments. From the two species correlation networks, compute the HSS (high salient skeleton) value for each edge, and compute the shared skeletons between the  $H$  &  $D$  networks with  $HSS > 0$ , and  $HSS \geq 0.2$ , respectively. This step is no difference from regular skeleton network analysis, until computing the shared skeletons.

The shared skeletons obtained from this *Step* [1] is the actually or *observed* shared skeletons.

**Step [2]:** Pool together all samples from  $H$  &  $D$  and perform random permutation of the combined  $(a+b)$  samples. Treat the first  $a$  samples as the permuted healthy treatment and the leftover  $b$  samples as the permuted diseased treatment.

According to the algorithm in *Step* [1], compute the shared skeletons for this specific pair of permuted  $H$  &  $D$  treatments.

**Step [3]:** Repeat *Step* [2] for 1000 times, and obtain 1000 sets of shared skeletons.

**Step [4]:** Compute a pseudo- $p$  value. Assume the shared skeletons from **Step [1]** is  $N$ , the numbers of shared skeletons from the 1000 random permutations in *Step* [2-3] are  $N_1, N_2, \dots, N_i, \dots, N_{1000}$ , the pseudo- $p$  value is the proportion of the permutations with  $N_i > N$  among 1000 times of permutations. That is, assuming  $n$  is the number of times satisfying  $N_i > N$  in 1000 permutations,  $p = n/1000$ .

### **References (Cited in "Transparent Methods")**

Abusleme L, Dupuy AK, Dutzan N, et al. (2013) The subgingival microbiome in health and periodontitis and its relationship with community biomass and inflammation. *The ISME Journal*, 7(5):1016-1025.

Alekseyenko AV, Perezperez GI, Souza AD, et al. (2013) Community differentiation of the cutaneous microbiota in psoriasis. *Microbiome*, 1,1(2013-12-23), 1(1):31-31.

- Blainey PC, Milla CE, Cornfield DN, et al. (2012) Quantitative analysis of the human airway microbial ecology reveals a pervasive signature for cystic fibrosis. *Science Translational Medicine*, 4(153):153ra130.
- Charlson ES, Chen J, Custersallen R, et al. (2010). Disordered microbial communities in the upper respiratory tract of cigarette smokers. *Plos One*, 5(12):e15216.
- Csermely P, London A, Wu LY, Uzzi B. Structure and dynamics of core/periphery networks. *Journal of Complex Networks*. 2013;1:93-123.
- Dilip V. Jeste (UC San Diego) <https://profiles.ucsd.edu/dilip.jeste>
- Etienne RS (2005) A new sampling formula for neutral biodiversity. *Ecology Letters* 8(3):253-260.
- Etienne RS. (2007) A neutral sampling formula for multiple samples and an 'exact' test of neutrality. *Ecology Letters* 10(7): 608-618.
- Faust K, Sathirapongsasuti JF, Izard J, Segata N, Gevers D, Raes J et al. (2012) Microbial co-occurrence relationships in the human microbiome. *PLoS Comput Biol*. 2012;8(7):e1002606.
- Faust K, Raes J. (2012) Microbial interactions: from networks to models. *Nat Rev Microbiol*. 10:538–550.
- Fisher RA (1922) On the interpretation of  $\chi^2$  from contingency tables, and the calculation of p-value. *Journal of the Royal Statistical Society*. Vol. 85(1): 87–94.
- Fisher RA (1954) Statistical Methods for Research Workers. *Oliver and Boyd*. ISBN 0-05-002170-2.
- Fodor AA, Klem ER, Gilpin DF, et al. (2012) The Adult Cystic Fibrosis Airway Microbiota Is Stable over Time and Infection Type, and Highly Resilient to Antibiotic Treatment of Exacerbations. *Plos One*, 7(9):e45001.
- Grady D, Thiemann C, Brockmann D. (2012) Robust classification of salient links in complex networks. *Nature Communications*. 2012;DOI: 10.1038/ncomms1847
- Griffen AL, Beall CJ, Campbell JH, et al. (2012) Distinct and complex bacterial profiles in human periodontitis and health revealed by 16S pyrosequencing. *The ISME Journal*, 6(6):1176.13
- Guo Z, Zhang J, Wang Z, et al. (2016) Intestinal Microbiota Distinguish Gout Patients from Healthy Humans. *Sci Rep*, 6:20602.
- Halfvarson J, Brislawn CJ, Lamendella R, et al. (2017) Dynamics of the human gut microbiome in Inflammatory Bowel Disease. *Nature Microbiology*, 2:17004.
- Hankin RKS (2007) Introducing UNTB, an R Package For Simulating Ecological Drift Under the Unified Neutral Theory of Biodiversity. *Journal of Statistical Software*. 22(12):15pp. (<https://cran.r-project.org/web/packages/untb/index.html>)
- Hanson CA, Fuhrman JA, Horner-Devine MC, Martiny JBH (2012) Beyond biogeographic patterns: processes shaping the microbial landscape. *Nat Rev Microbiol*. Vol.10:497–506
- Hill-Burns EM, Debelius JW, Morton JT et al. (2017) Parkinson's Disease and PD Medications Have Distinct Signatures of the Gut Microbiome. *Movement Disorders Official Journal of the Movement Disorder Society*, 32(5):739.
- Hubbell SP (2001) The unified neutral theory of biodiversity and biogeography. *Princeton University Press*.
- Junker BH, Schreiber F. (2008) *Analysis of biological networks*. Wiley. 2008.

- Kang DW, Adams JB, Gregory AC, et al. (2017) Microbiota Transfer Therapy alters gut ecosystem and improves gastrointestinal and autism symptoms: an open-label study. *Microbiome*, 5(1):10
- Kim, Jane (<https://clinicaltrials.gov/ct2/show/NCT02938806>)
- Koren O, Klarenhamer TR. (2011) Human oral, gut, and plaque microbiota in patients with atherosclerosis. *PNAS*, 108(Suppl 1):4592-4598.
- Kurtz ZD, Müller CL, Miraldi ER, Littman DR, Blaser MJ, Bonneau RA. (2015) Sparse and Compositionally Robust Inference of Microbial Ecological Networks. *PLOS Comp. Biol.* 2015. <https://doi.org/10.1371/journal.pcbi.1004226>
- Lazarevic V, Whiteson K, Hernandez D, et al. (2010) Study of inter- and intra-individual variations in the salivary microbiota. *BMC Genomics*, 11(1):1-11.
- Li LW, Ma ZS (2016) Testing the Neutral Theory of Biodiversity with Human Microbiome Datasets. *Scientific Reports*. 2016;6, Article No. 31448
- Lozupone C, Cota-Gomez A, Palmer B E, et al. (2013) Widespread colonization of the lung by *Tropheryma whippelii* in HIV infection. *American Journal of Respiratory & Critical Care Medicine*, 187(10):1110-1117.
- Ma ZS, Ye D. (2017) Trios—promising *in silico* biomarkers for differentiating the effect of disease on the human microbiome network. *Sci Rep* 2017;7:13259.
- Ma ZS, Ellison AM (2019) Dominance network analysis provides a new framework for studying the diversity-stability relationship. *Ecological Monographs*. <https://esajournals.onlinelibrary.wiley.com/doi/full/10.1002/ecm.1358>
- Ma ZS, Li LW, Gotelli NJ (2019) Diversity-disease relationships and shared species analyses for human microbiome-associated diseases, *The ISME Journal*. 2019;DOI: 10.1038/s41396-019-0395-y
- Mchardy IH, Li X, Tong M, et al. (2013) HIV Infection is associated with compositional and functional shifts in the rectal mucosal microbiota. *Microbiome*, 1(1):26.
- Neff CP, Krueger O, Xiong K, et al. (2018) Fecal Microbiota Composition Drives Immune Activation in HIV-infected Individuals. *Ebiomedicine*, 30
- Newman, MEJ (2002) Assortative mixing in networks. *Physical Review Letters*, 89(20), 208701.
- Newman MEJ (2003) Mixing patterns in networks. *Phys. Rev. E* 67, 026126
- Ning D, Deng Y, Tiedje JM, Zhou J (2019) A general framework for quantitatively assessing ecological stochasticity. *PNAS*, 116 (34): 16892-16898.
- Papa E, Docktor M, Smillie C, et al. (2012) Non-Invasive Mapping of the Gastrointestinal Microbiota Identifies Children with Inflammatory Bowel Disease. *Plos One*, 7(6):e39242.
- Rosindell J, Hubbell SP, Etienne RS. (2011) The Unified Neutral Theory of Biodiversity and Biogeography at Age Ten. *Trends in Ecology & Evolution*. Vol. 26:340–348.
- Röttgers L, Faust K (2018) From hairballs to hypotheses—biological insights from microbial networks. *FEMS Microbiology Reviews*, 42(6):761–780. <https://doi.org/10.1093/femsre/fuy030>
- Shekhtman LM, Bagrow JP, Brockmann D. (2014) Robustness of skeletons and salient features in networks. *Journal of Complex Networks*. doi:10.1093/comnet/cnt019
- Srinivasan S, Hoffman NG, Morgan MT, et al. (2012) Bacterial Communities in Women with

Bacterial Vaginosis: High Resolution Phylogenetic Analyses Reveal Relationships of Microbiota to Clinical Criteria. *Plos One*, 7(6):e37818.

Turnbaugh PJ, Hamady M, Yatsunenko T, et al. (2009) A core gut microbiome in obese and lean twins. *Nature*, 457(7228):480.

Urbaniak C, Mcmillan A, Angelini M, et al. (2014) Effect of chemotherapy on the microbiota and metabolome of human milk, a case report. *Microbiome*, 2(1):24.

Vellend M (2010) Conceptual synthesis in community ecology. *Q. Rev. Biol.* 2010;85:183–206

Wang T, Cai G, Qiu Y, et al. (2012) Structural segregation of gut microbiota between colorectal cancer patients and healthy volunteers. *The ISME Journal* 6(2):320-329.

Weng SL, Chiu CM, Lin FM, et al. (2014) Bacterial Communities in Semen from Men of Infertile Couples: Metagenomic Sequencing Reveals Relationships of Seminal Microbiota to Semen Quality. *Plos One*, 9(10):e110152.

Xiao Y, Angulo MT, Friedman J, Waldor MK, Weiss ST, Liu YY. (2017) Mapping the ecological networks of microbial communities. *Nature Communications*. Vol. 8, Article number: 2042

Zhang Z, Zhai H, Geng J, et al. (2013) Large-scale survey of gut microbiota associated with MHE Via 16S rRNA-based pyrosequencing. *American Journal of Gastroenterology*, 108(10):1601-1611.
